# Supplementary material for: Free radical scavenging activity of newly designed sesamol derivatives
Source: Royal Society of Chemistry journal article supplement (doi:10.1039/d1nj02225c), 2021-01-01
Supplement: d1nj02225c1.pdf [file d1nj02225c1.pdf]

## Electronic Supplementary Information

Laura M. Castro-Gonzalez<sup>1</sup>, Annia Galano<sup>2\*</sup>, Juan Raúl Alvarez-Idaboy<sup>3\*</sup>.

<sup>1</sup> *Centre for Molecular Simulation, Department of Biological Sciences, University of Calgary, Calgary, Alberta T2N1N4, Canada.*

<sup>2</sup> *Departamento de Química. Universidad Autónoma Metropolitana-Iztapalapa. San Rafael Atlixco 186, Col. Vicentina. Iztapalapa. C. P. 09340. México D. F. México.*

<sup>3</sup> *Departamento de Física y Química Teórica, Facultad de Química, Universidad Nacional Autónoma de México, México DF 04510, México.*

**Table S1.** Main kinetic expressions used for rate constant calculations.

| Equation                                                                                                                                                                                                                                                                                                                                                                                                                                                                                                                                                                                                                                                                                                                                                                 | Description                                                                                                                                     |
|--------------------------------------------------------------------------------------------------------------------------------------------------------------------------------------------------------------------------------------------------------------------------------------------------------------------------------------------------------------------------------------------------------------------------------------------------------------------------------------------------------------------------------------------------------------------------------------------------------------------------------------------------------------------------------------------------------------------------------------------------------------------------|-------------------------------------------------------------------------------------------------------------------------------------------------|
| $k = \sigma \kappa \frac{k_B T}{h} e^{-(\Delta G^\ddagger)/RT}$ <p><math>\sigma</math> reaction path degeneracy: 1,<br/> <math>\kappa</math> tunneling corrections<sup>1</sup>: computationally determined using an in-house program developed by the authors,<br/> <math>k_B, h, T</math> Boltzmann and Plank constants,<br/> Temperature: 1.38E-23, 6.63E-34, and 298.15 respectively.<br/> <math>\Delta G^\ddagger</math> Gibbs free energy of activation: For HAT, it was computationally obtained as the difference of Gibbs free energies (kcal/mol) between the TS and reactants and then energetically corrected by subtracting the factor 4.44, for SET it was determined as shown below,<br/> <math>R</math> universal gas constant: 1.986 E-3 kcal/(molK)</p> | <p>Conventional transition state theory (TST)<sup>2-4</sup> was used to compute the rate constants, together with the 1M standard state.</p>    |
| $\Delta G_{ET}^\ddagger = \frac{\lambda}{4} \left( 1 + \frac{\Delta G_{reacc}^0}{\lambda} \right)^2$ <p><math>\Delta G_{ET}^\ddagger</math> activation barrier<br/> <math>\Delta G_{reacc}^0</math> free energy of reaction<br/> <math>\lambda</math> reorganization therm<br/> <math>\lambda = \Delta E_{elect} - \Delta G_{reacc}^0</math>,<br/> <math>\Delta E_{elect}</math> electronic energy of reaction<br/> <math>\Delta E_{elect} = E_{elect\ products} - E_{elect\ reactants}</math>,<br/> <math>\Delta G_{reacc} = G_{reacc\ products} - G_{reacc\ reactants}</math></p>                                                                                                                                                                                      | <p>Marcus theory<sup>5</sup> was used to calculate the Gibbs free energies of activation for SET reactions.</p>                                 |
| $k_{app} = \frac{k_D k_{act}}{k_D + k_{act}}$ <p><math>k_{app}</math> apparent rate constant<br/> <math>k_{act}</math> thermal rate constant (obtained from TST)</p>                                                                                                                                                                                                                                                                                                                                                                                                                                                                                                                                                                                                     | <p>For high-rate constants (closed to diffusion-limit), the Collins-Kimball theory was used to include the diffusion control<sup>8</sup> in</p> |

$k_D$  steady-state Smoluchowski rate constant <sup>6</sup>

$$k_D = 4\pi R D_{AB} N_A$$

**R** reaction distance (i) for SET reactions, it is assumed to be the sum of the radius of the reactants; (ii) for HT reactions, taken from the transition as the distance between the two atoms that are involved in the H transfer. All in Angstroms.

$N_A$  Avogadro number: **6.02E+23**

$D_{AB}$  mutual diffusion coefficient of reactants A and B: free radical and antioxidant, respectively.

It's been calculated from  $D_A$  and  $D_B$  <sup>7</sup> which could be obtained as follows(Stokes-Einstein):

$$D = \frac{k_B T}{6\pi\eta a} \pi r^2$$

$k_B$  Boltzmann constant

**T** temperature: 298.15

$\eta$  viscosity of the solvent (water:  $8.91 \times 10^{-4}$  Pa s, pentyl ethanoate:  $8.62 \times 10^{-4}$  Pa s)

**a** solute radius, calculated via "volume" calculation in Gaussian 09 program In Angstroms

combination with the Smoluchowski <sup>6</sup> steady state for irreversible bimolecular reactions, and the Stokes-Einstein approach <sup>9</sup> (Stokes-Einstein).

**Table S2.** Endergonic values of Gibbs Free Energies of reaction ( $\Delta G_R$ ) for RAF and SET mechanism at 298.15 K, in kcal/mol.

| Label    | Mechanism | Pentyl ethanoate              |                                              | Water                         |                                              |
|----------|-----------|-------------------------------|----------------------------------------------|-------------------------------|----------------------------------------------|
|          |           | $\Delta G_R$ ( $\bullet$ OOH) | $\Delta G_R$ ( $\bullet$ OOCH <sub>3</sub> ) | $\Delta G_R$ ( $\bullet$ OOH) | $\Delta G_R$ ( $\bullet$ OOCH <sub>3</sub> ) |
| dS-9S1N  | RAF       | 21.55                         | 25.67                                        | 18.08                         | 20.73                                        |
| dS-9S2N  | RAF       | 13.88                         | 16.63                                        | 11.74                         | 13.82                                        |
| dS-9S3N  | RAF       | 12.72                         | 16.10                                        | 11.60                         | 13.95                                        |
| dS-9S4N  | RAF       | 18.43                         | 20.76                                        | 17.20                         | 19.05                                        |
| dS-9S5N  | RAF       | 12.18                         | 14.87                                        | 10.23                         | 12.22                                        |
| dS-9S6N  | RAF       | 10.71                         | 13.88                                        | 9.50                          | 11.40                                        |
| dS-9S1A  | RAF       | -                             | -                                            | 9.91                          | 13.38                                        |
| dS-9S2A  | RAF       | -                             | -                                            | 12.77                         | 12.27                                        |
| dS-9S3A  | RAF       | -                             | -                                            | 4.59                          | 7.76                                         |
| dS-9S4A  | RAF       | -                             | -                                            | 16.37                         | 18.92                                        |
| dS-9S5A  | RAF       | -                             | -                                            | 2.26                          | 4.61                                         |
| dS-9S6A  | RAF       | -                             | -                                            | 8.03                          | 11.60                                        |
| dS-46S1N | RAF       | 19.30                         | 22.63                                        | 16.93                         | 18.28                                        |
| dS-46S2N | RAF       | 12.88                         | 16.11                                        | 11.79                         | 13.19                                        |
| dS-46S3N | RAF       | 12.63                         | 16.49                                        | 11.71                         | 13.52                                        |
| dS-46S4N | RAF       | 12.56                         | 14.52                                        | 11.11                         | 12.90                                        |
| dS-46S5N | RAF       | 10.42                         | 12.68                                        | 9.55                          | 11.33                                        |
| dS-46S6N | RAF       | 9.31                          | 12.41                                        | 8.74                          | 10.64                                        |
| dS-46S1A | RAF       | -                             | -                                            | 15.39                         | 17.31                                        |
| dS-46S2A | RAF       | -                             | -                                            | 6.03                          | 9.16                                         |
| dS-46S3A | RAF       | -                             | -                                            | 11.85                         | 14.30                                        |
| dS-46S4A | RAF       | -                             | -                                            | 7.30                          | 11.40                                        |
| dS-46S5A | RAF       | -                             | -                                            | 8.74                          | 11.13                                        |
| dS-46S6A | RAF       | -                             | -                                            | 3.30                          | 6.59                                         |
| dS-48S1N | RAF       | 14.45                         | 17.56                                        | 12.69                         | 15.57                                        |
| dS-48S2N | RAF       | 11.63                         | 14.35                                        | 10.33                         | 12.53                                        |
| dS-48S3N | RAF       | 17.53                         | 20.91                                        | 14.23                         | 16.26                                        |
| dS-48S4N | RAF       | 14.11                         | 16.83                                        | 13.04                         | 14.72                                        |

|          |     |       |       |       |       |
|----------|-----|-------|-------|-------|-------|
| dS-48S5N | RAF | 9.51  | 11.84 | 9.23  | 11.14 |
| dS-48S6N | RAF | 7.23  | 9.77  | 6.80  | 8.84  |
| dS-48S1A | RAF | -     | -     | 12.15 | 17.40 |
| dS-48S2A | RAF | -     | -     | 7.20  | 9.88  |
| dS-48S3A | RAF | -     | -     | 13.50 | 16.26 |
| dS-48S4A | RAF | -     | -     | 8.04  | 10.37 |
| dS-48S5A | RAF | -     | -     | 7.93  | 10.21 |
| dS-48S6A | RAF | -     | -     | 3.29  | 7.64  |
| dS-49S1N | RAF | 14.30 | 16.45 | 14.03 | 15.71 |
| dS-49S2N | RAF | 12.94 | 15.23 | 12.02 | 13.79 |
| dS-49S3N | RAF | 13.55 | 16.67 | 12.68 | 13.96 |
| dS-49S4N | RAF | 15.27 | 18.45 | 14.37 | 17.03 |
| dS-49S5N | RAF | 11.77 | 15.14 | 10.87 | 12.10 |
| dS-49S6N | RAF | 10.68 | 13.07 | 9.94  | 11.81 |
| dS-49S1A | RAF | -     | -     | 8.80  | 11.40 |
| dS-49S2A | RAF | -     | -     | 12.43 | 14.66 |
| dS-49S3A | RAF | -     | -     | 6.65  | 9.52  |
| dS-49S4A | RAF | -     | -     | 12.82 | 15.57 |
| dS-49S5A | RAF | -     | -     | 4.07  | 7.22  |
| dS-49S6A | RAF | -     | -     | 9.09  | 6.71  |
| dS-9N    | SET | 58.37 | 59.76 | 10.62 | 8.40  |
| dS-46N   | SET | 56.59 | 57.98 | 8.43  | 6.21  |
| dS-48N   | SET | 51.11 | 52.50 | 3.88  | 1.66  |
| dS-49N   | SET | 63.93 | 65.32 | 15.40 | 13.18 |

**Table S3.** Rate constants ( $M^{-1}s^{-1}$ ) and their diffusion and molar fraction corrections for each derivative.

|                  | Label   | Mechanism | $k$ ( $\bullet OOH$ ) | $k_{dif}$ ( $\bullet OOH$ ) | $k$ ( $\bullet OOH$ ) | $k$ ( $\bullet OOCH_3$ ) | $k_{dif}$ ( $\bullet OOCH_3$ ) | $k$ ( $\bullet OOCH_3$ ) |
|------------------|---------|-----------|-----------------------|-----------------------------|-----------------------|--------------------------|--------------------------------|--------------------------|
| Water            | dS-9S1  | HAT       | 1.33E+07              | -                           | 1.28E+07              | 1.12E+07                 | -                              | 1.08E+07                 |
|                  | dS-9S2  | HAT       | 4.53E+06              | -                           | 4.36E+06              | 6.28E+06                 | -                              | 6.03E+06                 |
|                  | dS-46S1 | HAT       | 5.59E+06              | -                           | 4.49E+06              | 1.03E+07                 | -                              | 8.25E+06                 |
|                  | dS-46S2 | HAT       | 8.78E+06              | -                           | 7.05E+06              | 3.04E+06                 | -                              | 2.44E+06                 |
|                  | dS-46S3 | HAT       | 1.76E+08              | -                           | 1.41E+08              | 3.61E+07                 | -                              | 2.90E+07                 |
|                  | dS-48S1 | HAT       | 7.02E+06              | -                           | 6.04E+06              | 8.22E+06                 | -                              | 7.07E+06                 |
|                  | dS-48S2 | HAT       | 2.24E+07              | -                           | 1.93E+07              | 2.58E+07                 | -                              | 2.22E+07                 |
|                  | dS-48S3 | HAT       | 3.19E+07              | -                           | 2.74E+07              | -                        | -                              | -                        |
|                  | dS-49S1 | HAT       | 2.07E+05              | -                           | 1.48E+05              | 1.89E+05                 | -                              | 1.35E+05                 |
|                  | dS-49S2 | HAT       | 1.51E+06              | -                           | 1.08E+06              | 8.56E+05                 | -                              | 6.12E+05                 |
|                  | dS-9A   | SET       | 7.81E+10              | 7.25E+09                    | 2.83E+08              | 1.12E+12                 | 7.20E+09                       | 2.81E+08                 |
|                  | dS-46A  | SET       | 1.49E+10              | 5.14E+09                    | 1.01E+09              | 3.34E+11                 | 6.95E+09                       | 1.37E+09                 |
|                  | dS-48A  | SET       | 2.89E+09              | 2.12E+09                    | 2.94E+08              | 9.53E+10                 | 6.63E+09                       | 9.22E+08                 |
|                  | dS-48N  | SET       | 5.55E+06              | 5.59E+06                    | 4.81E+06              | 4.97E+08                 | 4.67E+08                       | 4.01E+08                 |
|                  | dS-49A  | SET       | 4.11E+09              | 2.71E+09                    | 7.72E+08              | 1.23E+11                 | 6.76E+09                       | 1.93E+09                 |
| Pentyl Ethanoate | dS-9S1  | HAT       | 1.58E+06              | -                           | 1.52E+06              | 3.87E+05                 | -                              | 3.72E+05                 |
|                  | dS-9S2  | HAT       | 8.26E+05              | -                           | 7.94E+05              | 2.57E+06                 | -                              | 2.47E+06                 |
|                  | dS-46S1 | HAT       | 7.57E+06              | -                           | 6.07E+06              | 4.86E+05                 | -                              | 3.90E+05                 |
|                  | dS-46S2 | HAT       | 2.40E+05              | -                           | 1.93E+05              | 4.36E+05                 | -                              | 3.50E+05                 |
|                  | dS-46S3 | HAT       | 6.62E+06              | -                           | 5.31E+06              | 1.59E+07                 | -                              | 1.27E+07                 |
|                  | dS-48S1 | HAT       | 1.77E+06              | -                           | 1.52E+06              | 2.00E+06                 | -                              | 1.72E+06                 |
|                  | dS-48S2 | HAT       | 1.88E+07              | -                           | 1.62E+07              | 2.91E+06                 | -                              | 2.51E+06                 |
|                  | dS-48S3 | HAT       | 2.82E+07              | -                           | 2.42E+07              | 4.51E+06                 | -                              | 3.88E+06                 |
|                  | dS-49S1 | HAT       | 5.09E+04              | -                           | 3.64E+04              | 1.10E+04                 | -                              | 7.87E+03                 |
|                  | dS-49S2 | HAT       | 1.25E+05              | -                           | 8.92E+04              | 1.89E+05                 | -                              | 1.35E+05                 |

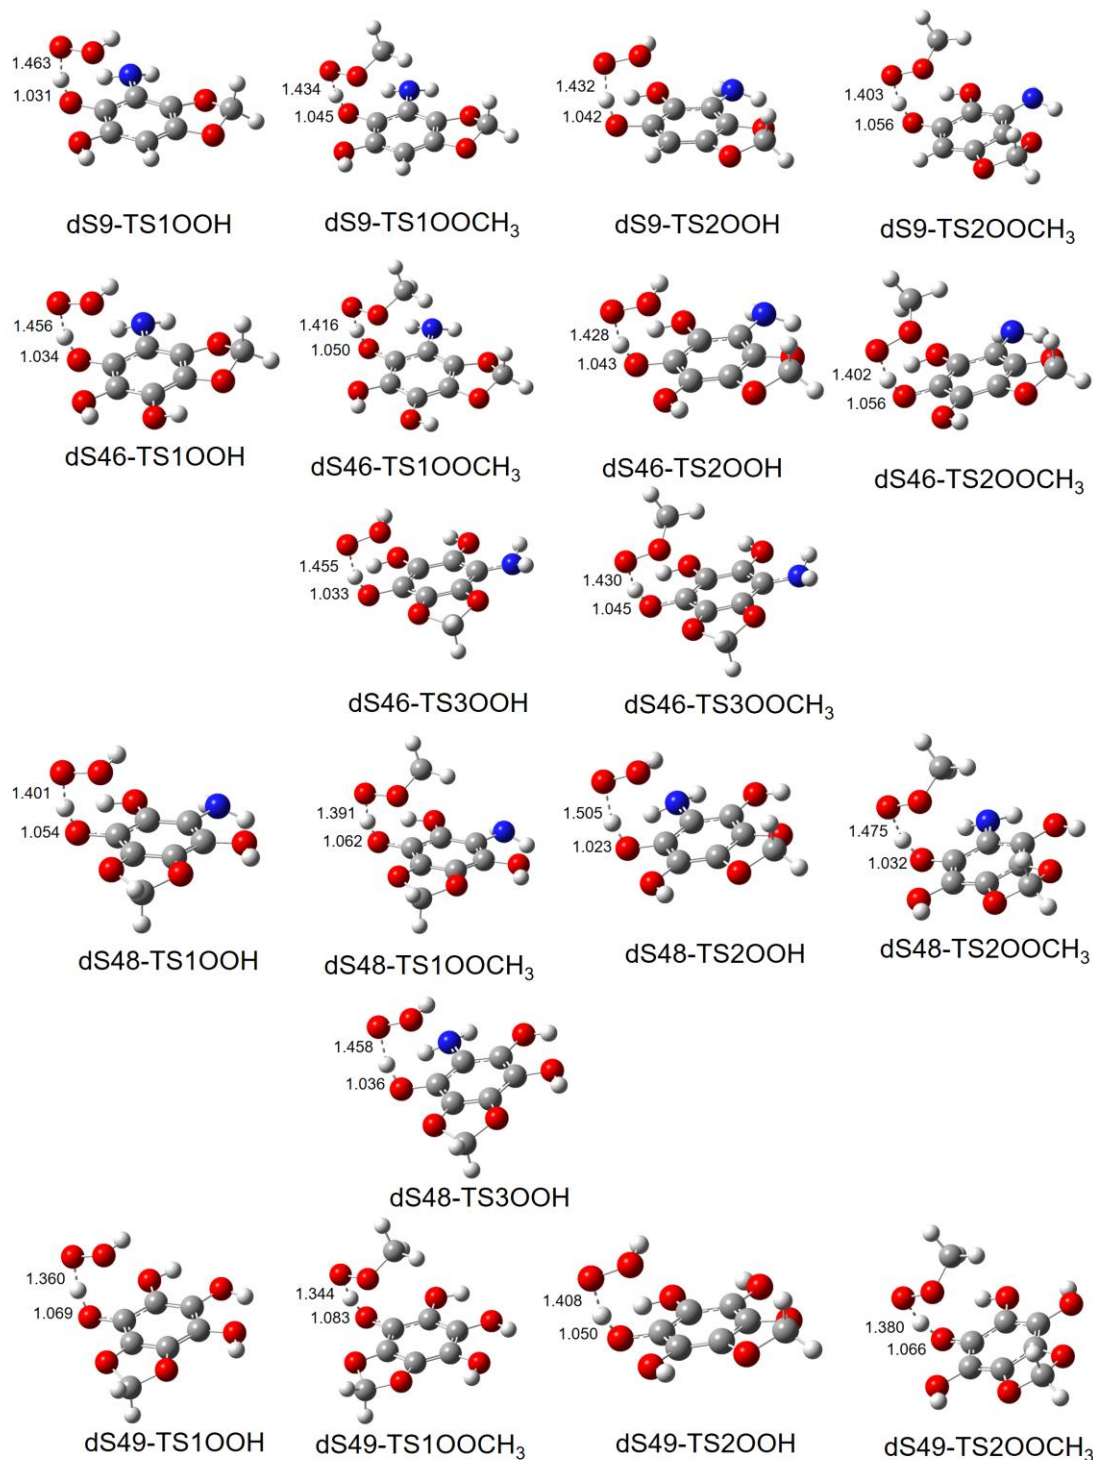

**Figure S1.** Transition states optimized geometries of each derivative in water solvent.

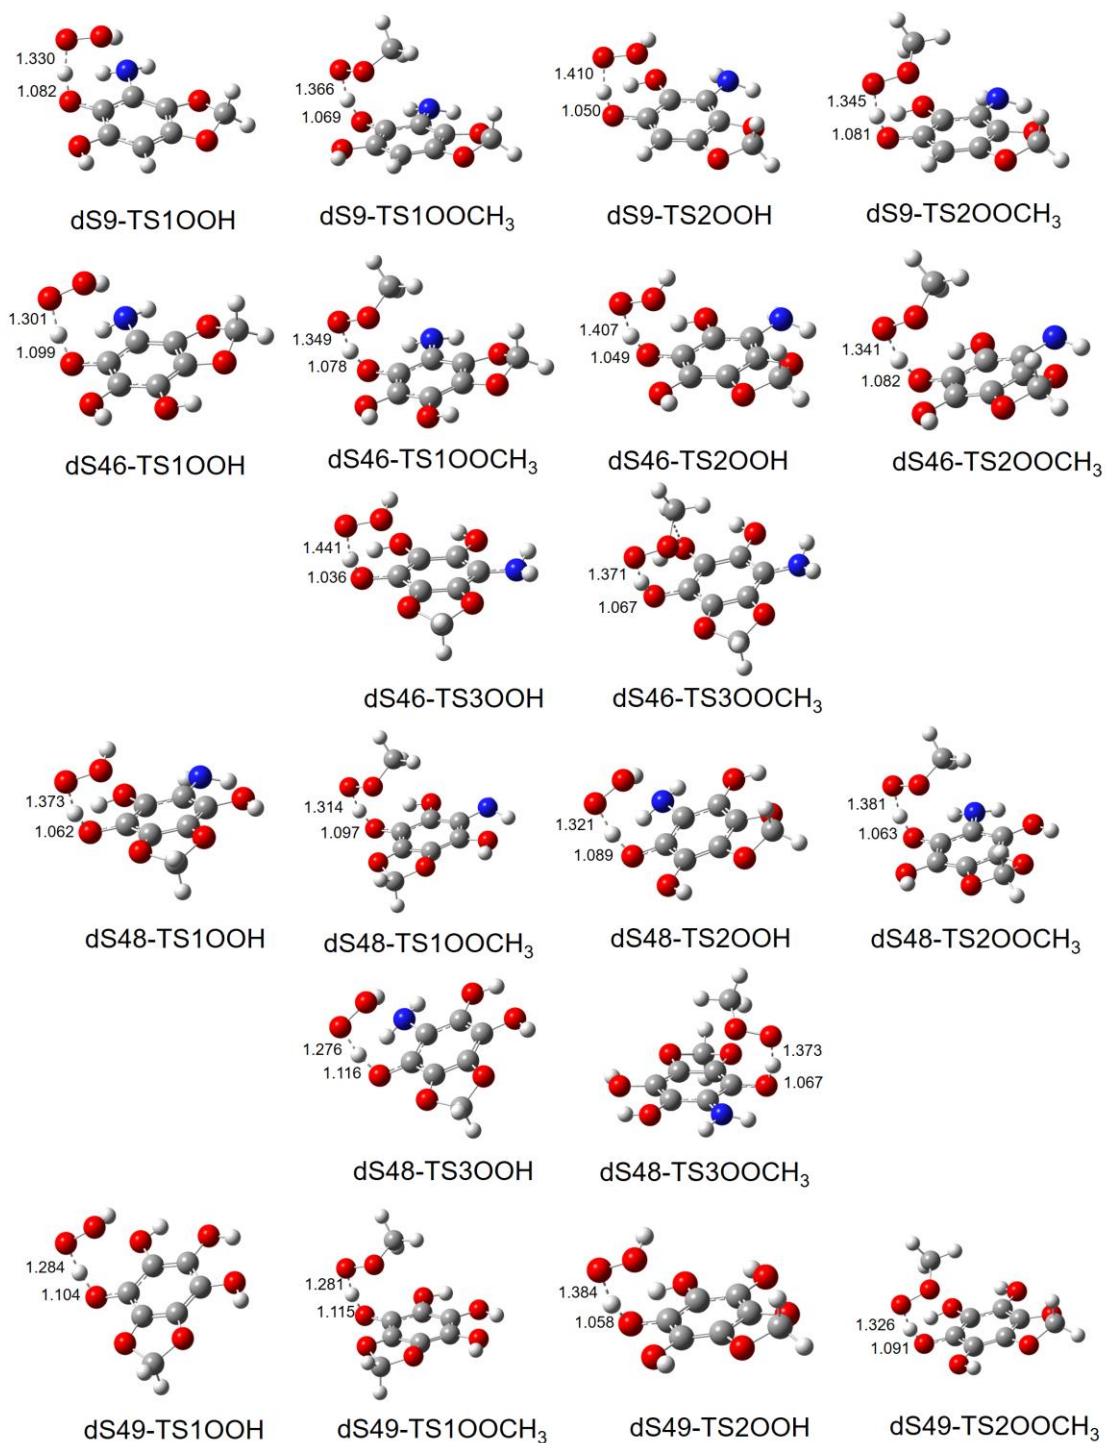

**Figure S2.** Transition states optimized geometries of each derivative in pentyl ethanoate solvent.



## Cartesian coordinates

### *TS-f-HAT-Water*

#### dS-9S1- OOH

|     |             |             |             |
|-----|-------------|-------------|-------------|
| 0 2 |             |             |             |
| C   | -0.74307600 | -1.30205700 | -0.48174900 |
| C   | 0.50357000  | -1.80602400 | -0.12298600 |
| C   | 1.50379400  | -0.86407100 | 0.01826200  |
| C   | 1.31226100  | 0.49054700  | -0.17071600 |
| C   | 0.09146500  | 1.01856500  | -0.52976500 |
| C   | -0.96048100 | 0.07665800  | -0.68483900 |
| H   | 0.66780900  | -2.86143400 | 0.03817400  |
| O   | -2.17125600 | 0.52477900  | -1.07871000 |
| H   | -2.76852200 | 0.64620700  | -0.24690500 |
| O   | -1.83200100 | -2.09987400 | -0.64318900 |
| H   | -1.58688000 | -3.02159700 | -0.50034900 |
| O   | 2.52129700  | 1.15772900  | -0.03147300 |
| O   | 2.82238100  | -1.08983700 | 0.31617600  |
| C   | 3.34929600  | 0.20926100  | 0.64531300  |
| H   | 3.26391000  | 0.35611500  | 1.72161800  |
| H   | 4.36577100  | 0.28630600  | 0.28191600  |
| N   | -0.14389300 | 2.35932200  | -0.68919200 |
| H   | 0.66550700  | 2.92848200  | -0.88356100 |
| H   | -0.95895700 | 2.58705300  | -1.23804400 |
| O   | -3.17002300 | 0.71398100  | 1.15873000  |
| O   | -2.10519400 | 0.13883000  | 1.73180300  |
| H   | -1.50399000 | 0.86146900  | 1.98368500  |

#### dS-9S1- OOCH<sub>3</sub>

|     |             |             |             |
|-----|-------------|-------------|-------------|
| 0 2 |             |             |             |
| C   | -0.60983800 | 1.40701100  | 0.49704600  |
| C   | 0.59792300  | 1.85236500  | -0.03094600 |
| C   | 1.59801300  | 0.90271000  | -0.09592800 |
| C   | 1.44346700  | -0.40564800 | 0.32547100  |
| C   | 0.26156400  | -0.87605200 | 0.85084200  |
| C   | -0.79584200 | 0.07163100  | 0.92192000  |
| H   | 0.73225000  | 2.86866800  | -0.37063100 |
| O   | -1.97612100 | -0.32452400 | 1.43061300  |
| H   | -2.66726100 | -0.37741100 | 0.64799300  |
| O   | -1.69633300 | 2.21174700  | 0.61080600  |
| H   | -1.49538700 | 3.08799100  | 0.26141300  |
| O   | 2.64747600  | -1.08235300 | 0.19253000  |
| O   | 2.88331300  | 1.07923400  | -0.53364900 |
| C   | 3.39591100  | -0.25592300 | -0.70193000 |
| H   | 3.20915100  | -0.57135600 | -1.72803400 |
| H   | 4.44340800  | -0.27472600 | -0.43040800 |
| N   | 0.05610100  | -2.17617500 | 1.22734100  |
| H   | 0.87956700  | -2.71538100 | 1.44533000  |
| H   | -0.72987300 | -2.33102700 | 1.83931500  |
| O   | -3.19543900 | -0.45125300 | -0.68282400 |
| O   | -2.10687400 | -0.06749700 | -1.36556100 |
| C   | -1.44823300 | -1.19945700 | -1.96016400 |
| H   | -0.49712300 | -0.82209100 | -2.32624600 |
| H   | -1.30895600 | -1.96882600 | -1.20383000 |
| H   | -2.06445300 | -1.56527800 | -2.77947700 |

#### dS-9S2- OOH

|     |             |             |             |
|-----|-------------|-------------|-------------|
| 0 2 |             |             |             |
| C   | -0.99664700 | -0.50924400 | -0.79631000 |
| C   | 0.03485000  | -1.46208000 | -0.71521300 |
| C   | 1.24734600  | -0.97825600 | -0.31316400 |
| C   | 1.46064300  | 0.36361600  | 0.00061000  |
| C   | 0.47853600  | 1.32594400  | -0.06977000 |
| C   | -0.77630500 | 0.84713700  | -0.48431600 |
| H   | -0.14423400 | -2.49672700 | -0.96426600 |
| O   | -1.78864500 | 1.74762400  | -0.56828900 |
| H   | -2.56735200 | 1.30466100  | -0.93587400 |
| O   | -2.23724800 | -0.85232100 | -1.20634300 |
| H   | -2.84179900 | -0.98637300 | -0.36830600 |
| O   | 2.77942100  | 0.56134400  | 0.32177200  |
| O   | 2.44399900  | -1.64827600 | -0.19733800 |
| C   | 3.29982000  | -0.76077800 | 0.53267200  |
| H   | 3.24073500  | -0.99792100 | 1.59388800  |
| H   | 4.30560600  | -0.81944200 | 0.13733800  |
| N   | 0.67101400  | 2.65021200  | 0.29080200  |
| H   | 1.62997100  | 2.95799100  | 0.22106300  |
| H   | 0.03235100  | 3.29059200  | -0.15767900 |
| O   | -3.31019700 | -0.98823800 | 0.98524200  |
| O   | -2.20485800 | -0.58701500 | 1.63339900  |
| H   | -2.30161400 | 0.37274900  | 1.76363300  |

#### dS-9S2- OOCH<sub>3</sub>

|     |             |             |             |
|-----|-------------|-------------|-------------|
| 0 2 |             |             |             |
| C   | -0.75093900 | -0.42324200 | -1.06039400 |
| C   | 0.23863300  | -1.41154400 | -0.89653300 |
| C   | 1.41240900  | -0.97728300 | -0.35212800 |
| C   | 1.63507700  | 0.35278900  | 0.01178400  |
| C   | 0.70301900  | 1.35150400  | -0.15320800 |
| C   | -0.51680800 | 0.92137400  | -0.70476600 |
| H   | 0.05263500  | -2.43645400 | -1.17894900 |
| O   | -1.47994100 | 1.85417800  | -0.88918500 |
| H   | -2.25285400 | 1.41696600  | -1.27790000 |
| O   | -1.96378500 | -0.71293600 | -1.57051400 |
| H   | -2.53388900 | -1.13891700 | -0.79028900 |
| O   | 2.91567800  | 0.49424100  | 0.48223600  |
| O   | 2.56387300  | -1.69107200 | -0.11234600 |
| C   | 3.35068900  | -0.84985700 | 0.73977600  |
| H   | 3.13842100  | -1.09491000 | 1.77937600  |
| H   | 4.39693900  | -0.94790600 | 0.48116700  |
| N   | 0.89988700  | 2.66472700  | 0.24498900  |
| H   | 1.87102900  | 2.93943200  | 0.27712300  |
| H   | 0.33539400  | 3.33115100  | -0.26157500 |
| O   | -2.98620800 | -1.45808300 | 0.49892100  |
| O   | -2.05830600 | -0.83338700 | 1.24258200  |
| C   | -2.59175600 | 0.38120800  | 1.79307600  |
| H   | -1.75496200 | 0.87380900  | 2.28046800  |
| H   | -2.99593400 | 0.98898800  | 0.98643300  |
| H   | -3.36841600 | 0.12153200  | 2.51003600  |

**dS-46S1- OOH**

0 2

|   |             |             |             |
|---|-------------|-------------|-------------|
| C | 0.67232500  | 1.18166300  | -0.48364200 |
| C | -0.62988700 | 1.52294900  | -0.13615300 |
| C | -1.51740900 | 0.47250000  | -0.00388200 |
| C | -1.15220100 | -0.84650400 | -0.19523600 |
| C | 0.12258000  | -1.22478000 | -0.55110000 |
| C | 1.05048700  | -0.15856600 | -0.69295300 |
| O | 2.31148200  | -0.44332700 | -1.07621300 |
| H | 2.91094200  | -0.50733500 | -0.23580200 |
| O | 1.63931100  | 2.13077500  | -0.60792800 |
| H | 1.26545100  | 2.99724600  | -0.40103500 |
| O | -2.27747100 | -1.64855600 | -0.05760100 |
| O | -2.85213600 | 0.54497800  | 0.28939400  |
| C | -3.20689000 | -0.81078900 | 0.63195200  |
| H | -3.08359000 | -0.93864600 | 1.70683500  |
| H | -4.21155500 | -1.01515800 | 0.28609400  |
| N | 0.52593200  | -2.53164800 | -0.70789900 |
| H | -0.21027300 | -3.18253400 | -0.93620100 |
| H | 1.35570200  | -2.64428000 | -1.27103300 |
| O | 3.29355200  | -0.58022600 | 1.16669800  |
| O | 2.11715300  | -0.29930100 | 1.74205100  |
| O | -0.93795400 | 2.84755800  | 0.04082200  |
| H | -1.77202700 | 2.93280000  | 0.51781700  |
| H | 1.67828500  | -1.15460000 | 1.89692100  |

**dS-46S2- OOH**

0 2

|   |             |             |             |
|---|-------------|-------------|-------------|
| C | -1.06776400 | 0.02044100  | -0.67632000 |
| C | -0.22782200 | -1.11778000 | -0.61482300 |
| C | 1.07269500  | -0.88271000 | -0.26028200 |
| C | 1.53599200  | 0.39422200  | 0.02298900  |
| C | 0.75711400  | 1.53629900  | -0.03245900 |
| C | -0.57300100 | 1.30487800  | -0.38588800 |
| O | -1.41046100 | 2.37761600  | -0.44805400 |
| H | -2.27449900 | 2.06867900  | -0.75716800 |
| O | -2.35335900 | -0.09327400 | -1.05732800 |
| H | -2.91636100 | -0.43360800 | -0.24830800 |
| O | 2.87473700  | 0.33438000  | 0.30905700  |
| O | 2.12326300  | -1.77818100 | -0.17630900 |
| C | 3.12680100  | -1.06154200 | 0.55199600  |
| H | 3.00789500  | -1.25584000 | 1.61709500  |
| H | 4.10626300  | -1.32158200 | 0.17285000  |
| N | 1.22892800  | 2.80221500  | 0.31000100  |
| H | 2.22166700  | 2.90815900  | 0.15572500  |
| H | 0.71210000  | 3.54712600  | -0.13577600 |
| O | -3.28354000 | -0.73006600 | 1.09956600  |
| O | -2.07551700 | -0.70870100 | 1.68131000  |
| O | -0.76577000 | -2.33292700 | -0.89726600 |
| H | -0.11184500 | -3.02666900 | -0.74564800 |
| H | -1.96663900 | 0.18461100  | 2.05213700  |

**dS-46S1- OCH<sub>3</sub>**

0 2

|   |             |             |             |
|---|-------------|-------------|-------------|
| C | 0.50034200  | 1.27012800  | -0.57938200 |
| C | -0.76534500 | 1.56630300  | -0.08720300 |
| C | -1.63654200 | 0.50049600  | 0.02451300  |
| C | -1.29055400 | -0.79217100 | -0.32699500 |
| C | -0.05348300 | -1.12549300 | -0.82720700 |
| C | 0.86491600  | -0.04568500 | -0.93673700 |
| O | 2.08961900  | -0.29114500 | -1.43067200 |
| H | 2.77821200  | -0.24732600 | -0.63897500 |
| O | 1.45039500  | 2.23374700  | -0.70057400 |
| H | 1.09137300  | 3.07764400  | -0.39560600 |
| O | -2.40094900 | -1.61066700 | -0.16933500 |
| O | -2.94021400 | 0.53330400  | 0.43715400  |
| C | -3.26004000 | -0.85195900 | 0.68315300  |
| H | -3.03110400 | -1.07677600 | 1.72431100  |
| H | -4.29372700 | -1.03319100 | 0.41977700  |
| N | 0.33135600  | -2.40652000 | -1.14930200 |
| H | -0.42003400 | -3.03945200 | -1.37805900 |
| H | 1.11805000  | -2.46014700 | -1.77861400 |
| O | 3.30325700  | -0.23691100 | 0.67555400  |
| O | 2.17027900  | -0.03473500 | 1.36315100  |
| C | 1.72838100  | -1.25255700 | 1.98867800  |
| H | 0.74720500  | -1.02826000 | 2.39782800  |
| H | 1.67762600  | -2.03961700 | 1.23910300  |
| H | 2.43338700  | -1.50735200 | 2.77758400  |
| O | -1.05337000 | 2.86557300  | 0.24225900  |
| H | -1.89867000 | 2.91241500  | 0.70455600  |

**dS-46S2- OCH<sub>3</sub>**

0 2

|   |             |             |             |
|---|-------------|-------------|-------------|
| C | -0.83999000 | -0.09290900 | -0.92357300 |
| C | 0.02562000  | -1.19401600 | -0.70790600 |
| C | 1.27294900  | -0.89130900 | -0.23538300 |
| C | 1.66660500  | 0.41803800  | 0.00960100  |
| C | 0.86436200  | 1.52629000  | -0.19999600 |
| C | -0.41288600 | 1.22589600  | -0.67368000 |
| O | -1.27257000 | 2.25812700  | -0.88500600 |
| H | -2.10730000 | 1.89202100  | -1.21307900 |
| O | -2.07592000 | -0.27564200 | -1.41293300 |
| H | -2.66877200 | -0.70792900 | -0.65362600 |
| O | 2.96674100  | 0.42424900  | 0.43788200  |
| O | 2.33498300  | -1.73995200 | 0.01515600  |
| C | 3.23479400  | -0.94447000 | 0.79484700  |
| H | 3.01177300  | -1.07870300 | 1.85236500  |
| H | 4.25632000  | -1.18948600 | 0.53527700  |
| N | 1.25777500  | 2.82683700  | 0.10892700  |
| H | 2.25753600  | 2.96190700  | 0.05739600  |
| H | 0.76974000  | 3.52492900  | -0.43426500 |
| O | -3.11360100 | -1.06310500 | 0.62797200  |
| O | -2.03221100 | -0.70889800 | 1.33969900  |
| C | -2.23913700 | 0.56837200  | 1.96930100  |
| H | -1.27455200 | 0.85010300  | 2.38231200  |
| H | -2.57849500 | 1.28152100  | 1.22094700  |
| H | -2.98205500 | 0.44777400  | 2.75561200  |
| O | -0.44878700 | -2.43998500 | -0.96549900 |
| H | 0.20839600  | -3.10369600 | -0.72287700 |

**dS-46S3- OOH**

0 2

|   |             |             |             |
|---|-------------|-------------|-------------|
| C | 0.90994000  | -0.03607600 | -0.68551900 |
| C | 0.42883500  | -1.35021500 | -0.48444400 |
| C | -0.86117400 | -1.59689100 | -0.05778900 |
| C | -1.76414300 | -0.54682500 | 0.21461200  |
| C | -1.27305800 | 0.73381800  | 0.00307100  |
| C | 0.00611600  | 0.98602200  | -0.42154000 |
| O | 1.23879600  | -2.42250100 | -0.72381400 |
| O | 2.15628600  | 0.15897800  | -1.15694200 |
| O | -1.33051900 | -2.87513600 | 0.12565900  |
| O | 0.22279400  | 2.34048400  | -0.46697300 |
| O | -1.91549700 | 1.93575300  | 0.26375900  |
| C | -1.10538900 | 2.89526900  | -0.42530200 |
| H | -1.09044300 | 3.82469700  | 0.12826200  |
| H | -1.46900700 | 3.00360600  | -1.44677500 |
| H | 2.78911400  | 0.36346200  | -0.36604900 |
| H | 2.08658600  | -2.09934200 | -1.05994400 |
| H | -0.63670000 | -3.50915000 | -0.09424300 |
| N | -3.04962700 | -0.80010700 | 0.60994800  |
| H | -3.21581400 | -1.70370900 | 1.02499700  |
| H | -3.53637400 | -0.03603500 | 1.05279300  |
| O | 3.28275400  | 0.47993800  | 0.99739600  |
| O | 2.13655500  | 0.36118200  | 1.67787200  |
| H | 2.04391400  | -0.58297300 | 1.89713000  |

**dS-48S1- OOH**

0 2

|   |             |             |             |
|---|-------------|-------------|-------------|
| C | 0.85107800  | -0.38130600 | -0.67601700 |
| C | -0.01603300 | -1.47138300 | -0.44118300 |
| C | -1.32497200 | -1.30613400 | -0.01702900 |
| C | -1.81333000 | 0.00027600  | 0.21566900  |
| C | -0.96978500 | 1.06464300  | -0.01814000 |
| C | 0.32380300  | 0.88826000  | -0.44901400 |
| O | 0.43232100  | -2.74634900 | -0.65646800 |
| O | 2.09716700  | -0.59860600 | -1.11866800 |
| O | 0.95416800  | 2.09831800  | -0.53189500 |
| O | -1.19760100 | 2.41054400  | 0.21368300  |
| C | -0.12590800 | 3.05249100  | -0.48944100 |
| H | 0.19321000  | 3.93150800  | 0.05471400  |
| H | -0.44126500 | 3.26291000  | -1.51044600 |
| H | 2.75964400  | -0.52097900 | -0.30252100 |
| H | 1.33960600  | -2.69670400 | -0.98868100 |
| O | 3.22966200  | -0.39968200 | 1.01152800  |
| O | 2.10332800  | -0.01317900 | 1.63510000  |
| O | -3.08976300 | 0.12091000  | 0.65655300  |
| H | -3.33462100 | 1.05083200  | 0.74480100  |
| N | -2.14026600 | -2.40512400 | 0.24543400  |
| H | -3.12556100 | -2.19987500 | 0.16261300  |
| H | -1.88495900 | -3.22411200 | -0.28759200 |
| H | 1.69244500  | -0.82443100 | 1.98134400  |

**dS-46S3- OOCH<sub>3</sub>**

0 2

|   |             |             |             |
|---|-------------|-------------|-------------|
| C | -0.69751700 | 0.03814200  | -0.93729700 |
| C | -0.19091400 | 1.34055000  | -0.72212000 |
| C | 1.04806800  | 1.55660500  | -0.15652500 |
| C | 1.87656300  | 0.48435700  | 0.24838900  |
| C | 1.36932000  | -0.78444100 | 0.01025500  |
| C | 0.13957300  | -1.00615000 | -0.55418400 |
| O | -0.93319300 | 2.43149400  | -1.07062600 |
| O | -1.90431300 | -0.12229400 | -1.50674700 |
| O | 1.53920400  | 2.82181700  | 0.04831400  |
| O | -0.12816100 | -2.34950900 | -0.57547200 |
| O | 1.92721900  | -1.99898000 | 0.38630700  |
| C | 1.16064100  | -2.95540700 | -0.35334400 |
| H | 1.03810500  | -3.85748200 | 0.23143000  |
| H | 1.63325900  | -3.12591300 | -1.32010600 |
| H | -2.57383000 | -0.44724300 | -0.77340000 |
| H | -1.77458900 | 2.12721600  | -1.43939600 |
| H | 0.87306500  | 3.47103000  | -0.21003800 |
| N | 3.10766800  | 0.71212100  | 0.79627500  |
| H | 3.25425900  | 1.62395400  | 1.20061200  |
| H | 3.52067200  | -0.05319900 | 1.30613100  |
| O | -3.13597500 | -0.72908700 | 0.51128300  |
| O | -2.04111900 | -0.56327400 | 1.26314000  |
| C | -2.06197400 | 0.71618400  | 1.92192600  |
| H | -1.07630500 | 0.83145000  | 2.36431100  |
| H | -2.26477600 | 1.49187900  | 1.18673500  |
| H | -2.83539300 | 0.69309400  | 2.68759300  |

**dS-48S1- OOCH<sub>3</sub>**

0 2

|   |             |             |             |
|---|-------------|-------------|-------------|
| C | 0.67008200  | -0.28198700 | -0.92785000 |
| C | -0.13032000 | -1.41365400 | -0.67616400 |
| C | -1.39135500 | -1.32437900 | -0.11052600 |
| C | -1.90017200 | -0.05044400 | 0.25434900  |
| C | -1.12287700 | 1.05450600  | 0.00550100  |
| C | 0.12452300  | 0.95233700  | -0.57226300 |
| O | 0.34376800  | -2.65950600 | -0.99583200 |
| O | 1.87851600  | -0.42568600 | -1.48653400 |
| O | 0.69199200  | 2.18664400  | -0.66992600 |
| O | -1.37068500 | 2.37869900  | 0.32496900  |
| C | -0.40879100 | 3.09574100  | -0.45826400 |
| H | -0.05957900 | 3.95895800  | 0.09258000  |
| H | -0.84230500 | 3.34259400  | -1.42626400 |
| H | 2.60779900  | -0.21009700 | -0.74549600 |
| H | 1.22074100  | -2.55362400 | -1.39057100 |
| O | 3.20685900  | 0.02302600  | 0.48857700  |
| O | 2.10714100  | 0.25844400  | 1.22919100  |
| C | 1.76063000  | -0.89635700 | 2.01194200  |
| H | 0.77438100  | -0.68656900 | 2.41775400  |
| H | 1.74894300  | -1.77433000 | 1.36961200  |
| H | 2.49473500  | -1.00700000 | 2.80829000  |
| O | -3.12736500 | -0.01304700 | 0.82764200  |
| H | -3.40171700 | 0.89963100  | 0.98155500  |
| N | -2.13712100 | -2.46002400 | 0.16839300  |
| H | -3.13217600 | -2.29707800 | 0.21606800  |
| H | -1.90310700 | -3.25548500 | -0.40732300 |

**dS-48S2- OOH**

0 2

|   |             |             |             |
|---|-------------|-------------|-------------|
| C | -0.99721500 | -0.39295000 | -0.67866400 |
| C | 0.05231500  | -1.31797800 | -0.48625800 |
| C | 1.27087100  | -0.79490300 | -0.15500500 |
| C | 1.47278800  | 0.57686300  | -0.01401300 |
| C | 0.47659700  | 1.49756900  | -0.19668800 |
| C | -0.79118300 | 0.99946200  | -0.55113600 |
| O | -2.22216600 | -0.84132600 | -1.03610700 |
| H | -2.84770100 | -0.78898400 | -0.22797600 |
| O | 2.79324300  | 0.80980900  | 0.27685500  |
| O | 2.47670400  | -1.44630200 | 0.02377900  |
| C | 3.29589400  | -0.47553300 | 0.68388500  |
| H | 3.17339200  | -0.57427800 | 1.76161100  |
| H | 4.32078700  | -0.58113000 | 0.35396100  |
| O | -3.31026100 | -0.57677800 | 1.18785100  |
| O | -2.15201700 | -0.23010600 | 1.76288400  |
| O | -0.21754000 | -2.64581300 | -0.64245000 |
| H | 0.58178200  | -3.16510100 | -0.49415600 |
| O | 0.61774900  | 2.85531900  | -0.07231300 |
| H | 1.51620900  | 3.07547600  | 0.20010800  |
| N | -1.85225500 | 1.85832200  | -0.68847800 |
| H | -1.62259200 | 2.82595200  | -0.85452300 |
| H | -2.63072500 | 1.50644700  | -1.22503300 |
| H | -2.09145800 | 0.73975800  | 1.68863700  |

**dS-48S2- OOCH<sub>3</sub>**

0 2

|   |             |             |             |
|---|-------------|-------------|-------------|
| C | -0.83517000 | -0.16106500 | -0.94324300 |
| C | 0.07795400  | -1.21493000 | -0.70626900 |
| C | 1.30710300  | -0.86238300 | -0.22895200 |
| C | 1.65209600  | 0.46859100  | 0.00094900  |
| C | 0.79638300  | 1.51200000  | -0.23014200 |
| C | -0.48287500 | 1.18890800  | -0.72091500 |
| O | -2.06323600 | -0.43229200 | -1.43544500 |
| H | -2.64169100 | -0.80620100 | -0.66800400 |
| O | 2.95366900  | 0.52759800  | 0.43041100  |
| O | 2.40295700  | -1.66401800 | 0.03779400  |
| C | 3.26043100  | -0.82412600 | 0.81782100  |
| H | 3.02328100  | -0.94812400 | 1.87360000  |
| H | 4.29422700  | -1.03855900 | 0.58044500  |
| O | -3.10048900 | -1.08129300 | 0.70711800  |
| O | -2.00565600 | -0.69727300 | 1.37059600  |
| C | -2.20903700 | 0.57953500  | 1.99888300  |
| H | -1.24883400 | 0.84649200  | 2.43135600  |
| H | -2.51791100 | 1.29979400  | 1.24351300  |
| H | -2.96992600 | 0.46708200  | 2.76881400  |
| O | -0.34160300 | -2.48921000 | -0.94519300 |
| H | 0.34625400  | -3.11617000 | -0.69183400 |
| O | 1.08813000  | 2.83571300  | -0.02004100 |
| H | 1.98019600  | 2.92828200  | 0.33463000  |
| N | -1.41089600 | 2.17298900  | -0.92041800 |
| H | -1.06344400 | 3.11369300  | -1.01809500 |
| H | -2.19736000 | 1.92980300  | -1.50219900 |

**dS-48S3- OOH**

0 2

|   |             |             |             |
|---|-------------|-------------|-------------|
| C | -0.73909500 | -0.53862100 | -0.67253700 |
| C | -0.97529200 | 0.86148000  | -0.57338800 |
| C | 0.04544900  | 1.71495900  | -0.13873000 |
| C | 1.31213900  | 1.23509100  | 0.17676800  |
| C | 1.52702300  | -0.13053100 | 0.04852200  |
| C | 0.53578300  | -0.98489200 | -0.35587400 |
| O | -1.71560200 | -1.36235000 | -1.09535000 |
| O | -0.25134800 | 3.05458100  | -0.05568200 |
| O | 1.00111400  | -2.28190800 | -0.30700700 |
| O | 2.66078600  | -0.84878200 | 0.37524500  |
| C | 2.42728200  | -2.12190300 | -0.24846500 |
| H | 2.85617800  | -2.90737600 | 0.35946100  |
| H | 2.81965300  | -2.09414500 | -1.26462800 |
| H | -2.39296600 | -1.49045100 | -0.32219600 |
| H | 0.51218900  | 3.53409600  | 0.28870300  |
| O | -3.00156600 | -1.39837300 | 0.99907900  |
| O | -2.03320800 | -0.75672100 | 1.67238800  |
| O | 2.24752200  | 2.12890600  | 0.59326900  |
| H | 3.09005500  | 1.68964700  | 0.76327900  |
| N | -2.22545000 | 1.35219600  | -0.84350100 |
| H | -2.29312600 | 2.34387100  | -1.01110700 |
| H | -2.80834900 | 0.77429600  | -1.42999400 |
| H | -2.26679700 | 0.18837500  | 1.64768500  |

**dS-49S1- OOH**

0 2

|   |             |             |             |
|---|-------------|-------------|-------------|
| C | 0.83655600  | 0.35506800  | -0.68210700 |
| C | 0.82317600  | -1.05861700 | -0.53893300 |
| C | -0.30790300 | -1.72985000 | -0.10910000 |
| C | -1.48813900 | -1.03710600 | 0.20228400  |
| C | -1.47427700 | 0.33763400  | 0.05111800  |
| C | -0.35375500 | 1.00964400  | -0.36724100 |
| O | 1.97064700  | -1.72007000 | -0.83824400 |
| O | 1.91110800  | 0.99497900  | -1.13900300 |
| O | -0.23235900 | -3.09369900 | 0.00518500  |
| O | -0.59871500 | 2.35725100  | -0.36669400 |
| O | -2.47422000 | 1.24053100  | 0.35187800  |
| C | -2.03396100 | 2.44746900  | -0.28901500 |
| H | -2.30970800 | 3.30090600  | 0.31597500  |
| H | -2.43605200 | 2.48192900  | -1.30058500 |
| H | 2.60006200  | 1.12625800  | -0.33271600 |
| H | 1.83881400  | -2.66971400 | -0.71444100 |
| H | -1.10309200 | -3.45403300 | 0.21634900  |
| O | 3.14235400  | 1.15939000  | 0.91406200  |
| O | 2.12605600  | 0.67137500  | 1.65170900  |
| O | -2.54303500 | -1.76541600 | 0.63061700  |
| H | -3.31418700 | -1.20490900 | 0.78630600  |
| H | 2.29930800  | -0.28061200 | 1.75100300  |

**dS-49S2- OOH**

0 2

|   |             |             |             |
|---|-------------|-------------|-------------|
| C | -1.06401300 | -0.00846900 | -0.67890300 |
| C | -0.19190000 | -1.12118400 | -0.60828700 |
| C | 1.10131900  | -0.85546900 | -0.24977400 |
| C | 1.54209200  | 0.43285000  | 0.02697000  |
| C | 0.72079200  | 1.53916000  | -0.03881700 |
| C | -0.60278900 | 1.29125300  | -0.39299300 |
| O | -1.45202100 | 2.34800900  | -0.45662600 |
| H | -2.31326400 | 2.03304500  | -0.76887400 |
| O | -2.34228400 | -0.15826000 | -1.05759200 |
| H | -2.89223500 | -0.53153500 | -0.24484600 |
| O | 2.87558900  | 0.40429900  | 0.31384100  |
| O | 2.16911500  | -1.72687600 | -0.16256000 |
| C | 3.16332000  | -0.98721800 | 0.55482200  |
| H | 3.06128800  | -1.18227200 | 1.62119400  |
| H | 4.14437100  | -1.22292900 | 0.16419400  |
| O | -3.24565500 | -0.83699000 | 1.08354500  |
| O | -2.06462800 | -0.65597400 | 1.69564500  |
| O | 1.20427200  | 2.78578700  | 0.23977400  |
| H | 0.52033500  | 3.44399300  | 0.06235500  |
| O | -0.69808800 | -2.34904900 | -0.88476400 |
| H | -0.03017700 | -3.02721700 | -0.72322800 |
| H | -2.07364500 | 0.25380700  | 2.04099200  |

**dS-49S1- OOCH<sub>3</sub>**

0 2

|   |             |             |             |
|---|-------------|-------------|-------------|
| C | 0.68485200  | -0.17271500 | -0.94178800 |
| C | -0.00352500 | -1.39152000 | -0.71165300 |
| C | -1.25740700 | -1.40903500 | -0.13432200 |
| C | -1.90129500 | -0.21854500 | 0.26197300  |
| C | -1.23449600 | 0.96536200  | 0.03130800  |
| C | 0.00898300  | 0.98869200  | -0.55435700 |
| O | 0.61826800  | -2.54343800 | -1.08372900 |
| O | 1.88839200  | -0.15102500 | -1.50375100 |
| O | -1.85411300 | -2.62911100 | 0.03531300  |
| O | 0.47140700  | 2.26957500  | -0.60418600 |
| O | -1.59610900 | 2.24737300  | 0.39891200  |
| C | -0.69968700 | 3.07449700  | -0.35488800 |
| H | -0.42182600 | 3.94013800  | 0.23146000  |
| H | -1.15704800 | 3.32383000  | -1.31114700 |
| H | 2.60007900  | 0.15576600  | -0.74705800 |
| H | 0.04231100  | -3.29349200 | -0.88364300 |
| H | -2.69284900 | -2.53086700 | 0.50366500  |
| O | 3.15424300  | 0.41860000  | 0.44829400  |
| O | 2.06829100  | 0.30166100  | 1.23995400  |
| C | 2.05054600  | -0.98837300 | 1.87458700  |
| H | 1.08488700  | -1.05747300 | 2.36785700  |
| H | 2.16850400  | -1.76146400 | 1.11789600  |
| H | 2.86316900  | -1.02661700 | 2.59787900  |
| O | -3.11351300 | -0.33500600 | 0.84616500  |
| H | -3.46998500 | 0.53096300  | 1.08215500  |

**dS-49S2- OOCH<sub>3</sub>**

0 2

|   |             |             |             |
|---|-------------|-------------|-------------|
| C | -0.83366500 | -0.11727500 | -0.92686600 |
| C | 0.06316300  | -1.19192000 | -0.70272300 |
| C | 1.30188100  | -0.85822100 | -0.22777300 |
| C | 1.67198600  | 0.46038300  | 0.01405800  |
| C | 0.82891700  | 1.53088200  | -0.20505700 |
| C | -0.43962900 | 1.21455000  | -0.68109400 |
| O | -1.30928700 | 2.23197500  | -0.89076100 |
| H | -2.14563800 | 1.86083000  | -1.21012000 |
| O | -2.06111300 | -0.33173400 | -1.41301200 |
| H | -2.65022000 | -0.76818800 | -0.63983800 |
| O | 2.96526500  | 0.49721200  | 0.44272300  |
| O | 2.38064400  | -1.68222900 | 0.02591500  |
| C | 3.26734100  | -0.86657300 | 0.79927800  |
| H | 3.05422700  | -1.00333300 | 1.85819700  |
| H | 4.29241400  | -1.08731800 | 0.53247100  |
| O | -3.08438800 | -1.11042400 | 0.62419900  |
| O | -2.01179700 | -0.72768900 | 1.33720700  |
| C | -2.25493800 | 0.54133500  | 1.96960300  |
| H | -1.29991400 | 0.84612900  | 2.38826800  |
| H | -2.60891300 | 1.24829600  | 1.22187800  |
| H | -2.99800100 | 0.39963100  | 2.75218900  |
| O | 1.23786000  | 2.80850600  | 0.04692400  |
| H | 0.52761200  | 3.42331800  | -0.17703100 |
| O | -0.37891500 | -2.44831100 | -0.95499600 |
| H | 0.29193900  | -3.09677400 | -0.70815500 |

**OOH**

|     |             |             |             |
|-----|-------------|-------------|-------------|
| 0 2 |             |             |             |
| O   | 0.05481800  | 0.70576400  | 0.00000000  |
| O   | 0.05481800  | -0.59543700 | 0.00000000  |
| H   | -0.87708100 | -0.88261600 | 0.00000000  |
| 0 1 |             |             |             |
| O   | 0.70249100  | 0.10234900  | -0.06934800 |
| O   | -0.70259200 | -0.10260600 | -0.06895400 |
| H   | -1.01759100 | 0.56680300  | 0.55236500  |
| H   | 1.01839700  | -0.56475100 | 0.55405000  |

**OOCH<sub>3</sub>**

|     |             |             |             |
|-----|-------------|-------------|-------------|
| 0 2 |             |             |             |
| O   | 1.17520400  | -0.27506700 | 0.00000500  |
| O   | 0.16539900  | 0.53264500  | -0.00000200 |
| C   | -1.09657500 | -0.17967000 | -0.00000300 |
| H   | -1.85948800 | 0.59158400  | -0.00181000 |
| H   | -1.14218700 | -0.78848600 | -0.89852500 |
| H   | -1.14370100 | -0.78570000 | 0.90032800  |
| 0 1 |             |             |             |
| O   | 1.16978400  | -0.22619200 | -0.12187200 |
| H   | 1.40751800  | -0.43525200 | 0.79279800  |
| O   | 0.02934500  | 0.60779100  | 0.02631200  |
| C   | -1.12487900 | -0.22990600 | -0.00183800 |
| H   | -1.96686900 | 0.45298700  | 0.09303500  |
| H   | -1.17750200 | -0.76636700 | -0.94789700 |
| H   | -1.10690700 | -0.92471900 | 0.83757300  |

***TS-f-HAT-Pentyl Ethanoate*****dS-9S1- OOH**

|     |             |             |             |
|-----|-------------|-------------|-------------|
| 0 2 |             |             |             |
| C   | 0.46477300  | 1.68735100  | -0.11559800 |
| C   | -0.87695700 | 1.84756500  | 0.22089000  |
| C   | -1.66708000 | 0.71858700  | 0.13022400  |
| C   | -1.18380300 | -0.51696500 | -0.26610800 |
| C   | 0.12898900  | -0.69977800 | -0.62001400 |
| C   | 0.98248000  | 0.43891900  | -0.54036800 |
| H   | -1.27581400 | 2.79989000  | 0.54149200  |
| O   | 2.24431100  | 0.33295600  | -0.92841800 |
| H   | 2.81531700  | -0.25012200 | -0.21827000 |
| O   | 1.34678500  | 2.70690000  | -0.06303000 |
| H   | 0.90185200  | 3.50593000  | 0.23808900  |
| O   | -2.21201700 | -1.43079900 | -0.29932800 |
| O   | -2.99964900 | 0.61694200  | 0.37222400  |
| C   | -3.25636300 | -0.79581600 | 0.43960400  |
| H   | -3.20858200 | -1.11014700 | 1.48318300  |
| H   | -4.21343900 | -1.01020600 | -0.02041600 |
| N   | 0.68325000  | -1.93775300 | -0.92253100 |
| H   | 0.01594200  | -2.64852600 | -1.18622000 |
| H   | 1.45720800  | -1.88732900 | -1.57274500 |
| O   | 3.23357000  | -0.99712800 | 0.79926100  |
| O   | 2.08525000  | -1.23707500 | 1.47079500  |
| H   | 1.58652900  | -1.84875500 | 0.88878800  |

**dS-9S1- OOCH<sub>3</sub>**

|     |             |             |             |
|-----|-------------|-------------|-------------|
| 0 2 |             |             |             |
| C   | 0.53738100  | 1.48542300  | -0.39072600 |
| C   | -0.68969300 | 1.85086000  | 0.15742800  |
| C   | -1.65824300 | 0.86526500  | 0.17016500  |
| C   | -1.45220100 | -0.41260500 | -0.31900300 |
| C   | -0.25168000 | -0.80245100 | -0.86700000 |
| C   | 0.77638600  | 0.18319300  | -0.89241900 |
| H   | -0.87115100 | 2.84239900  | 0.54750000  |
| O   | 1.94299400  | -0.14168300 | -1.43839600 |
| H   | 2.67833600  | -0.19261200 | -0.66374300 |
| O   | 1.57978600  | 2.33834900  | -0.46698000 |
| H   | 1.35071900  | 3.17125500  | -0.04230200 |
| O   | -2.62382000 | -1.13602900 | -0.23717200 |
| O   | -2.94466000 | 0.97319800  | 0.60054800  |
| C   | -3.41862600 | -0.38139300 | 0.67471800  |
| H   | -3.26018700 | -0.75059600 | 1.68985500  |
| H   | -4.45869900 | -0.41509400 | 0.37259200  |
| N   | 0.01298500  | -2.06958300 | -1.31679900 |
| H   | -0.77633200 | -2.63890000 | -1.57630500 |
| H   | 0.81450900  | -2.14905200 | -1.92356200 |
| O   | 3.24356100  | -0.39889700 | 0.56243600  |
| O   | 2.17145900  | -0.18201600 | 1.34487500  |
| C   | 1.64583500  | -1.43009000 | 1.81495900  |
| H   | 0.73705400  | -1.18100100 | 2.35790200  |
| H   | 1.42902000  | -2.07896200 | 0.96723600  |
| H   | 2.37631000  | -1.89296100 | 2.47720100  |

**dS-9S2- OOH**

|     |             |             |             |
|-----|-------------|-------------|-------------|
| 0 2 |             |             |             |
| C   | -0.98525700 | -0.55686400 | -0.78396800 |
| C   | 0.06378800  | -1.48965200 | -0.69016300 |
| C   | 1.26849600  | -0.97963100 | -0.29415000 |
| C   | 1.45816800  | 0.37131900  | 0.00402900  |
| C   | 0.46059900  | 1.31708500  | -0.08756300 |
| C   | -0.78286000 | 0.80816200  | -0.49453900 |
| H   | -0.09671800 | -2.53010100 | -0.92670900 |
| O   | -1.81768300 | 1.67796900  | -0.58742800 |
| H   | -2.54934100 | 1.22052900  | -1.02659100 |
| O   | -2.21753800 | -0.90620500 | -1.18053900 |

**dS-9S2- OOCH<sub>3</sub>**

|     |             |             |             |
|-----|-------------|-------------|-------------|
| 0 2 |             |             |             |
| C   | -0.76270800 | -0.40550300 | -1.06296300 |
| C   | 0.22293900  | -1.40285100 | -0.91119200 |
| C   | 1.40182800  | -0.98262500 | -0.36713100 |
| C   | 1.63602900  | 0.34402900  | 0.00960900  |
| C   | 0.70936400  | 1.35220900  | -0.14276100 |
| C   | -0.51079200 | 0.93428900  | -0.69530500 |
| H   | 0.02898100  | -2.42407500 | -1.20119200 |
| O   | -1.47500100 | 1.86391600  | -0.87268200 |
| H   | -2.20168600 | 1.42998900  | -1.34557300 |
| O   | -1.96848200 | -0.65386600 | -1.57790100 |

|   |             |              |             |   |             |             |             |
|---|-------------|--------------|-------------|---|-------------|-------------|-------------|
| H | -2.82058600 | -1.04210000  | -0.33204200 | H | -2.58093500 | -1.06669100 | -0.78896500 |
| O | 2.76562000  | 0.59738700   | 0.31864900  | O | 2.91112500  | 0.47276400  | 0.47492100  |
| O | 2.46912700  | -1.62134000  | -0.17354700 | O | 2.54269200  | -1.70172200 | -0.13969000 |
| C | 3.31117400  | -0.711125700 | 0.53598000  | C | 3.33819200  | -0.87581300 | 0.71099400  |
| H | 3.27272400  | -0.93869200  | 1.60219900  | H | 3.13896200  | -1.13089600 | 1.75309400  |
| H | 4.31643700  | -0.75483700  | 0.13412300  | H | 4.38375200  | -0.97724400 | 0.44604700  |
| N | 0.63062000  | 2.65131900   | 0.24170400  | N | 0.91258900  | 2.66074700  | 0.26540500  |
| H | 1.57944200  | 2.98649700   | 0.17578300  | H | 1.87787400  | 2.95030200  | 0.30360800  |
| H | -0.03103800 | 3.27602100   | -0.19361900 | H | 0.32638400  | 3.33559200  | -0.20203400 |
| O | -3.32679700 | -0.88373600  | 0.97385400  | O | -3.09864800 | -1.31347700 | 0.42741600  |
| O | -2.19984900 | -0.57841200  | 1.64311500  | O | -2.08147900 | -0.90923400 | 1.21067400  |
| H | -2.23295200 | 0.38316100   | 1.78433800  | C | -2.44291900 | 0.28524100  | 1.91428300  |
|   |             |              |             | H | -1.55612700 | 0.57951600  | 2.47002500  |
|   |             |              |             | H | -2.73079700 | 1.05791400  | 1.20348300  |
|   |             |              |             | H | -3.26778400 | 0.05946500  | 2.58856400  |

### dS-46S1- OOH

0 2

|   |             |             |             |
|---|-------------|-------------|-------------|
| C | 0.23152000  | 1.55940600  | -0.23238100 |
| C | -1.12142900 | 1.42053100  | 0.06251500  |
| C | -1.63982000 | 0.14250100  | 0.03149300  |
| C | -0.87290000 | -0.96671400 | -0.28105400 |
| C | 0.45469100  | -0.86924100 | -0.60726100 |
| C | 1.02693600  | 0.43937000  | -0.57031700 |
| O | 2.29040200  | 0.60889300  | -0.91056800 |
| H | 2.95914600  | 0.14570500  | -0.17230400 |
| O | 0.81349000  | 2.77460000  | -0.20632500 |
| H | 0.15351000  | 3.42845300  | 0.05457800  |
| O | -1.67939900 | -2.08227500 | -0.27805700 |
| O | -2.92723100 | -0.23141700 | 0.25608100  |
| C | -2.85262200 | -1.66275800 | 0.41745900  |
| H | -2.74892400 | -1.88502100 | 1.48037900  |
| H | -3.72730800 | -2.11953400 | -0.02869900 |
| N | 1.28398000  | -1.96822500 | -0.83561200 |
| H | 0.79073000  | -2.81930900 | -1.06672400 |
| H | 2.02142600  | -1.78047700 | -1.50378200 |
| O | 3.50336500  | -0.45745600 | 0.84370000  |
| O | 2.43197600  | -0.94380400 | 1.51414600  |
| O | -1.82834300 | 2.54944800  | 0.35140200  |
| H | -2.70705700 | 2.32886300  | 0.67866200  |
| H | 2.07827600  | -1.64358500 | 0.92142700  |

### dS-46S1-OOCH<sub>3</sub>

0 2

|   |             |             |             |
|---|-------------|-------------|-------------|
| C | 0.44285000  | 1.31529700  | -0.54175000 |
| C | -0.83636300 | 1.55184700  | -0.04956900 |
| C | -1.67181200 | 0.45918800  | 0.04394300  |
| C | -1.28279200 | -0.81757900 | -0.32543300 |
| C | -0.03380900 | -1.09300700 | -0.82891800 |
| C | 0.85612800  | 0.01866200  | -0.92543800 |
| O | 2.06722200  | -0.18559500 | -1.42460700 |
| H | 2.78564100  | -0.09360300 | -0.62679100 |
| O | 1.33581500  | 2.31900600  | -0.64444000 |
| H | 0.94454300  | 3.12061600  | -0.27646600 |
| O | -2.36061400 | -1.66906000 | -0.18081300 |
| O | -2.97028800 | 0.44735400  | 0.45423400  |
| C | -3.24867900 | -0.95057500 | 0.66946900  |
| H | -3.03124700 | -1.18756000 | 1.71269600  |
| H | -4.27535100 | -1.15843900 | 0.39330000  |
| N | 0.41010300  | -2.35109800 | -1.16731200 |
| H | -0.29686600 | -3.02504700 | -1.41517300 |
| H | 1.21547000  | -2.35727600 | -1.77493100 |
| O | 3.33350900  | -0.14685600 | 0.60462800  |
| O | 2.22103500  | -0.05408000 | 1.35665100  |
| C | 1.88805600  | -1.33968600 | 1.89505700  |
| H | 0.93425800  | -1.21047400 | 2.40140700  |
| H | 1.80744000  | -2.06423400 | 1.08559300  |
| H | 2.66257000  | -1.63723100 | 2.60080700  |
| O | -1.16328800 | 2.83330000  | 0.29505700  |
| H | -2.00577500 | 2.85349800  | 0.76088800  |

**dS-46S2- OOH**

|     |             |             |             |
|-----|-------------|-------------|-------------|
| 0 2 |             |             |             |
| C   | -1.06484300 | 0.05614700  | -0.66971700 |
| C   | -0.24541700 | -1.09795700 | -0.62202200 |
| C   | 1.05771000  | -0.88635700 | -0.26081300 |
| C   | 1.55279500  | 0.37677500  | 0.03211200  |
| C   | 0.79523900  | 1.53417400  | -0.01514900 |
| C   | -0.53882600 | 1.32870600  | -0.37162400 |
| O   | -1.35399900 | 2.40969600  | -0.42785900 |
| H   | -2.21350900 | 2.10911600  | -0.75546000 |
| O   | -2.34705400 | -0.00602500 | -1.03989700 |
| H   | -2.90774500 | -0.44125700 | -0.26730400 |
| O   | 2.88399100  | 0.28218500  | 0.31256300  |
| O   | 2.07838300  | -1.80584000 | -0.18478800 |
| C   | 3.10155500  | -1.11901500 | 0.54004300  |
| H   | 2.99015100  | -1.32166600 | 1.60652500  |
| H   | 4.07351100  | -1.40151200 | 0.15452600  |
| N   | 1.28333500  | 2.79043100  | 0.33278700  |
| H   | 2.27379700  | 2.90700800  | 0.18028800  |
| H   | 0.75422500  | 3.55197900  | -0.06556200 |
| O   | -3.31479600 | -0.73193800 | 1.04790300  |
| O   | -2.12075500 | -0.74958200 | 1.66697300  |
| O   | -0.78744800 | -2.29765700 | -0.92231600 |
| H   | -0.15088700 | -2.99703000 | -0.73758700 |
| H   | -2.05873500 | 0.09878000  | 2.13745900  |

**dS-46S2- OCH<sub>3</sub>**

|     |             |             |             |
|-----|-------------|-------------|-------------|
| 0 2 |             |             |             |
| C   | -0.82936800 | -0.11532500 | -0.92991700 |
| C   | 0.05134800  | -1.20429700 | -0.70746800 |
| C   | 1.28831200  | -0.87910000 | -0.22293500 |
| C   | 1.67100400  | 0.43268000  | 0.02708200  |
| C   | 0.85931000  | 1.53118700  | -0.19904500 |
| C   | -0.40880200 | 1.21003500  | -0.68322800 |
| O   | -1.27806900 | 2.22258900  | -0.91495200 |
| H   | -2.07011600 | 1.83470800  | -1.31491700 |
| O   | -2.05432700 | -0.28788400 | -1.41541800 |
| H   | -2.66537300 | -0.73056700 | -0.63966200 |
| O   | 2.96284100  | 0.44744100  | 0.46009200  |
| O   | 2.34853200  | -1.71848800 | 0.02898400  |
| C   | 3.24094200  | -0.91863200 | 0.80780700  |
| H   | 3.02531100  | -1.06207200 | 1.86771400  |
| H   | 4.26583100  | -1.15577400 | 0.54840600  |
| N   | 1.23100800  | 2.83965600  | 0.09847700  |
| H   | 2.22272100  | 3.01323300  | 0.03210200  |
| H   | 0.69946400  | 3.53174100  | -0.40854700 |
| O   | -3.15588400 | -1.00729200 | 0.57758500  |
| O   | -2.08022200 | -0.72265200 | 1.33429600  |
| C   | -2.27161100 | 0.52760100  | 2.00999000  |
| H   | -1.33343200 | 0.73586200  | 2.51826400  |
| H   | -2.50363500 | 1.30584100  | 1.28473100  |
| H   | -3.08432900 | 0.42098200  | 2.72695100  |
| O   | -0.37643400 | -2.45655900 | -0.97410200 |
| H   | 0.28818900  | -3.09367800 | -0.68996400 |

**dS-46S3- OOH**

|     |             |             |             |
|-----|-------------|-------------|-------------|
| 0 2 |             |             |             |
| C   | -0.88730700 | 0.24084100  | -0.67819000 |
| C   | -0.16982800 | 1.43779600  | -0.45193400 |
| C   | 1.14200900  | 1.44252700  | -0.02625700 |
| C   | 1.83674900  | 0.23936400  | 0.22407600  |
| C   | 1.12202000  | -0.92500700 | -0.01359000 |
| C   | -0.18298900 | -0.93715400 | -0.44644700 |
| O   | -0.76666000 | 2.64145900  | -0.66856100 |
| O   | -2.14296500 | 0.31746900  | -1.13586800 |
| O   | 1.82643400  | 2.60614300  | 0.17480000  |
| O   | -0.63151100 | -2.22029400 | -0.52034700 |
| O   | 1.53734600  | -2.21784500 | 0.22430200  |
| C   | 0.57030800  | -3.00456700 | -0.47499000 |
| H   | 0.38315600  | -3.92305000 | 0.06756500  |
| H   | 0.91570100  | -3.17649800 | -1.49633600 |
| H   | -2.80332900 | 0.09155600  | -0.36996900 |
| H   | -1.64186900 | 2.47965700  | -1.04584600 |
| H   | 1.25729400  | 3.34823000  | -0.05931100 |
| N   | 3.14354600  | 0.25182400  | 0.62880000  |
| H   | 3.48923000  | 1.11246200  | 1.02138100  |
| H   | 3.50672900  | -0.58885900 | 1.04689400  |
| O   | -3.33350800 | 0.00343200  | 0.96666800  |
| O   | -2.20379200 | -0.21787700 | 1.65465200  |
| H   | -1.98025700 | 0.63103300  | 2.07284100  |

**dS-46S3- OCH<sub>3</sub>**

|     |             |             |             |
|-----|-------------|-------------|-------------|
| 0 2 |             |             |             |
| C   | 0.69124500  | 0.00286100  | -0.93726100 |
| C   | 0.23087300  | -1.31799400 | -0.71966600 |
| C   | -0.99299700 | -1.59237100 | -0.15135200 |
| C   | -1.86110600 | -0.55374400 | 0.25785800  |
| C   | -1.40533600 | 0.73475100  | 0.02263600  |
| C   | -0.18725600 | 1.01470800  | -0.54960300 |
| O   | 1.01721600  | -2.37092500 | -1.07284100 |
| O   | 1.87928000  | 0.18136300  | -1.51140500 |
| O   | -1.42301100 | -2.87176900 | 0.04922400  |
| O   | 0.00863900  | 2.35975900  | -0.58185900 |
| O   | -2.01747800 | 1.91231100  | 0.39641200  |
| C   | -1.29785100 | 2.90384600  | -0.33943500 |
| H   | -1.20900600 | 3.80737300  | 0.25143400  |
| H   | -1.79084500 | 3.06978700  | -1.29931100 |
| H   | 2.56395900  | 0.53206600  | -0.77210100 |
| H   | 1.79901700  | -2.01874500 | -1.52026700 |
| H   | -0.75052900 | -3.48230900 | -0.27412200 |
| N   | -3.08097500 | -0.83219900 | 0.80667700  |
| H   | -3.21982100 | -1.76226400 | 1.16675700  |
| H   | -3.54413200 | -0.09528100 | 1.31292700  |
| O   | 3.15719700  | 0.74711600  | 0.44528200  |
| O   | 2.07908300  | 0.64114700  | 1.23753800  |
| C   | 2.11608800  | -0.59013000 | 1.97219900  |
| H   | 1.14902800  | -0.67124500 | 2.46244500  |
| H   | 2.28124800  | -1.41998300 | 1.28738500  |
| H   | 2.91854100  | -0.53759000 | 2.70704900  |



**dS-48S1- OOH**

O 2

|   |             |             |             |
|---|-------------|-------------|-------------|
| C | 0.83537500  | -0.41039200 | -0.66589800 |
| C | -0.06310400 | -1.47755900 | -0.42739200 |
| C | -1.36700700 | -1.28191100 | 0.00057200  |
| C | -1.82006400 | 0.03753600  | 0.22316100  |
| C | -0.95102000 | 1.07763400  | -0.01857100 |
| C | 0.34070300  | 0.87616000  | -0.44898500 |
| O | 0.35315900  | -2.75377200 | -0.64626300 |
| O | 2.06021600  | -0.68435800 | -1.10900600 |
| O | 0.98341900  | 2.06828500  | -0.54471100 |
| O | -1.16213000 | 2.41949100  | 0.19961300  |
| C | -0.07266900 | 3.04059600  | -0.49451000 |
| H | 0.26276400  | 3.91078900  | 0.05636600  |
| H | -0.38265400 | 3.27339700  | -1.51440500 |
| H | 2.75348500  | -0.54126300 | -0.31692400 |
| H | 1.24750300  | -2.71304200 | -1.01054900 |
| O | 3.26427500  | -0.45773600 | 0.95526700  |
| O | 2.18816300  | 0.00326200  | 1.62318200  |
| O | -3.08978700 | 0.20244500  | 0.65916000  |
| H | -3.29601800 | 1.14077300  | 0.73991400  |
| N | -2.20512800 | -2.35789100 | 0.26924700  |
| H | -3.18895600 | -2.14477800 | 0.20813500  |
| H | -1.96113700 | -3.20205300 | -0.22620200 |
| H | 1.80910600  | -0.77190500 | 2.07073400  |

**dS-48S2- OOH**

O 2

|   |             |             |             |
|---|-------------|-------------|-------------|
| C | -0.92937200 | -0.55553700 | -0.61054000 |
| C | 0.19150000  | -1.39232800 | -0.36660800 |
| C | 1.36851000  | -0.76248100 | -0.07786100 |
| C | 1.48316400  | 0.62375300  | -0.02087000 |
| C | 0.42494800  | 1.46488300  | -0.24835200 |
| C | -0.79918800 | 0.85836300  | -0.55657400 |
| O | -2.09546700 | -1.08796300 | -0.93387500 |
| H | -2.81661100 | -0.93500400 | -0.13235200 |
| O | 2.77568900  | 0.96236400  | 0.24098600  |
| O | 2.60516500  | -1.32263600 | 0.12630300  |
| C | 3.38180500  | -0.26309800 | 0.69112100  |
| H | 3.31989800  | -0.30633500 | 1.77897800  |
| H | 4.39777000  | -0.31711100 | 0.32041800  |
| O | -3.45042800 | -0.60347400 | 0.97808700  |
| O | -2.53110100 | 0.14372500  | 1.63166500  |
| O | 0.04042900  | -2.73337700 | -0.44548300 |
| H | 0.87458100  | -3.16360400 | -0.22819400 |
| O | 0.48093200  | 2.82563900  | -0.19654600 |
| H | 1.36853200  | 3.11462800  | 0.04053800  |
| N | -1.94237300 | 1.63751700  | -0.68316500 |
| H | -1.76417400 | 2.61419500  | -0.87033500 |
| H | -2.64331000 | 1.24709000  | -1.29983000 |
| H | -2.47002100 | 0.96797000  | 1.10193900  |

**dS-48S1- OOCH<sub>3</sub>**

O 2

|   |             |             |             |
|---|-------------|-------------|-------------|
| C | 0.69062300  | -0.08362700 | -0.93627100 |
| C | 0.13433600  | -1.36515200 | -0.69974500 |
| C | -1.10821300 | -1.55544400 | -0.12093100 |
| C | -1.86272200 | -0.41985600 | 0.26063000  |
| C | -1.33363900 | 0.82712200  | 0.02067000  |
| C | -0.09734800 | 1.00784700  | -0.55761200 |
| O | 0.85257700  | -2.46429800 | -1.05760400 |
| O | 1.88241500  | 0.00372200  | -1.50722000 |
| O | 0.19221500  | 2.33177700  | -0.61446900 |
| O | -1.86259100 | 2.04766500  | 0.37414100  |
| C | -1.06656300 | 2.97907000  | -0.36884900 |
| H | -0.90518200 | 3.87222300  | 0.22215300  |
| H | -1.54830300 | 3.18171000  | -1.32657100 |
| H | 2.60109900  | 0.32904600  | -0.74562800 |
| H | 1.65522600  | -2.15342200 | -1.49827300 |
| O | 3.17776400  | 0.54394600  | 0.41522000  |
| O | 2.09466200  | 0.55578100  | 1.21823400  |
| C | 2.04356500  | -0.64520300 | 2.00065500  |
| H | 1.08959100  | -0.61681100 | 2.52135300  |
| H | 2.10798900  | -1.51364900 | 1.34718600  |
| H | 2.87044900  | -0.63881500 | 2.70967900  |
| O | -3.06750900 | -0.62925400 | 0.83765800  |
| H | -3.50074100 | 0.21279800  | 1.01965500  |
| N | -1.59121200 | -2.82965700 | 0.14911500  |
| H | -2.59534500 | -2.89467800 | 0.21615300  |
| H | -1.19280200 | -3.55406500 | -0.42847100 |

**dS-48S2- OOCH<sub>3</sub>**

O 2

|   |             |             |             |
|---|-------------|-------------|-------------|
| C | -0.80638900 | -0.28077700 | -0.94230500 |
| C | 0.16179000  | -1.27619600 | -0.65419000 |
| C | 1.36486600  | -0.83707400 | -0.18241600 |
| C | 1.64562700  | 0.51546100  | -0.00053700 |
| C | 0.74344800  | 1.50540900  | -0.28124700 |
| C | -0.51002900 | 1.09517100  | -0.76899600 |
| O | -2.00308400 | -0.60873700 | -1.42397300 |
| H | -2.62185800 | -0.90110700 | -0.61057400 |
| O | 2.93347700  | 0.65519600  | 0.43233100  |
| O | 2.48995700  | -1.57219900 | 0.11790100  |
| C | 3.30109800  | -0.66607200 | 0.86584300  |
| H | 3.06995800  | -0.76278700 | 1.92790800  |
| H | 4.34619800  | -0.84161100 | 0.64184100  |
| O | -3.15848700 | -0.98864200 | 0.65933500  |
| O | -2.08232500 | -0.64400800 | 1.38562300  |
| C | -2.28327200 | 0.63672300  | 1.99492300  |
| H | -1.35179200 | 0.86827700  | 2.50615400  |
| H | -2.49979500 | 1.37603200  | 1.22454300  |
| H | -3.10556800 | 0.56511500  | 2.70553700  |
| O | -0.15893600 | -2.57591800 | -0.85258200 |
| H | 0.55875700  | -3.13484600 | -0.53609300 |
| O | 0.96900600  | 2.84294100  | -0.12363700 |
| H | 1.87027200  | 2.99202500  | 0.18038800  |
| N | -1.48958600 | 2.01890800  | -1.00946500 |
| H | -1.20127100 | 2.97532200  | -1.13721400 |
| H | -2.25749900 | 1.70629600  | -1.58265700 |

**dS-48S3- OOH**

0 2

|   |             |             |             |
|---|-------------|-------------|-------------|
| C | -0.65383000 | -0.64793800 | -0.59521900 |
| C | -0.93555200 | 0.75464200  | -0.55214300 |
| C | 0.03864600  | 1.67164000  | -0.17440300 |
| C | 1.32983200  | 1.25627200  | 0.15011300  |
| C | 1.60177400  | -0.10054000 | 0.08815800  |
| C | 0.65088700  | -1.02225300 | -0.26379300 |
| O | -1.57304600 | -1.50960700 | -0.97299300 |
| O | -0.30541700 | 2.99119500  | -0.13792600 |
| O | 1.18159600  | -2.27677800 | -0.17569200 |
| O | 2.77179700  | -0.72974000 | 0.42200700  |
| C | 2.59464400  | -2.05439800 | -0.11035500 |
| H | 3.04643900  | -2.77632800 | 0.55885500  |
| H | 3.00898300  | -2.08690900 | -1.11918100 |
| H | -2.39691000 | -1.54866900 | -0.22185200 |
| H | 0.45446200  | 3.51337000  | 0.14379400  |
| O | -3.16443200 | -1.42235200 | 0.78979000  |
| O | -2.56680000 | -0.43855100 | 1.50665800  |
| O | 2.22325600  | 2.20705500  | 0.50954700  |
| H | 3.08039300  | 1.81484000  | 0.71276400  |
| N | -2.24359500 | 1.17405400  | -0.77420100 |
| H | -2.33848600 | 2.16508100  | -0.94740400 |
| H | -2.74530700 | 0.61770500  | -1.45469500 |
| H | -2.69844200 | 0.36821400  | 0.96185200  |

**dS-49S1- OOH**

0 2

|   |             |             |             |
|---|-------------|-------------|-------------|
| C | -0.69637900 | -0.59776300 | -0.59965100 |
| C | -0.90035900 | 0.81161600  | -0.52624200 |
| C | 0.11011700  | 1.68093900  | -0.16053600 |
| C | 1.38889000  | 1.20768300  | 0.15733300  |
| C | 1.59004600  | -0.15763500 | 0.09754000  |
| C | 0.58945700  | -1.03078700 | -0.25355000 |
| O | -2.14717100 | 1.27937000  | -0.79524300 |
| O | -1.62810500 | -1.41812100 | -1.02180600 |
| O | -0.19375800 | 3.00999000  | -0.11958600 |
| O | 1.05634400  | -2.30640300 | -0.18267800 |
| O | 2.72606700  | -0.84930500 | 0.42446800  |
| C | 2.48104700  | -2.16067800 | -0.11012000 |
| H | 2.88957600  | -2.90631100 | 0.56091900  |
| H | 2.89574500  | -2.21732700 | -1.11733900 |
| H | -2.47465600 | -1.44674400 | -0.31387100 |
| H | -2.12020700 | 2.24497400  | -0.82516900 |
| H | 0.59093200  | 3.52239000  | 0.10783500  |
| O | -3.22560900 | -1.37225500 | 0.72496200  |
| O | -2.59377800 | -0.44116700 | 1.48195600  |
| O | 2.32015200  | 2.12027700  | 0.50931200  |
| H | 3.16191300  | 1.69593200  | 0.71388300  |
| H | -2.83335900 | 0.40776000  | 1.07400700  |

**dS-48S3- OOCH<sub>3</sub>**

0 2

|   |             |             |             |
|---|-------------|-------------|-------------|
| C | -0.69149700 | -0.08374600 | -0.92148900 |
| C | -0.49507100 | 1.30149600  | -0.63386100 |
| C | 0.68770200  | 1.73977400  | -0.02302900 |
| C | 1.70598100  | 0.85318600  | 0.29519500  |
| C | 1.51535300  | -0.48546000 | -0.01821100 |
| C | 0.36293100  | -0.93744200 | -0.60566200 |
| O | -1.81244800 | -0.49300500 | -1.50726200 |
| O | 0.80935400  | 3.07889700  | 0.22151600  |
| O | 0.42253100  | -2.30394600 | -0.71716500 |
| O | 2.34989300  | -1.54127700 | 0.26378400  |
| C | 1.81440500  | -2.59044900 | -0.55817200 |
| H | 1.93769700  | -3.54273200 | -0.05723500 |
| H | 2.30108700  | -2.55445300 | -1.53496400 |
| H | -2.58337300 | -0.50490200 | -0.76979400 |
| H | 1.67819700  | 3.25559200  | 0.59910700  |
| O | -3.24584200 | -0.46513700 | 0.43268800  |
| O | -2.22776500 | -0.13217300 | 1.24446100  |
| O | 2.82014400  | 1.35335100  | 0.88881200  |
| H | 3.48020300  | 0.66152600  | 1.00980500  |
| N | -1.48307800 | 2.18802000  | -0.92430900 |
| H | -1.26465800 | 3.16964000  | -0.89776400 |
| H | -2.20813000 | 1.89357300  | -1.55691800 |
| C | -1.73835500 | -1.29469900 | 1.92775400  |
| H | -0.82701300 | -0.98081100 | 2.43130100  |
| H | -2.48701600 | -1.61764800 | 2.65016400  |
| H | -1.54107400 | -2.08558800 | 1.20663700  |

**dS-49S1- OOCH<sub>3</sub>**

0 2

|   |             |             |             |
|---|-------------|-------------|-------------|
| C | 0.66353400  | 0.12379100  | -0.93578200 |
| C | 0.35778600  | -1.25539200 | -0.74209800 |
| C | -0.83099400 | -1.65722300 | -0.16127700 |
| C | -1.78743200 | -0.72605800 | 0.26984400  |
| C | -1.50014400 | 0.60835700  | 0.07819100  |
| C | -0.32485300 | 1.02013700  | -0.50345100 |
| O | 1.26837000  | -2.16904900 | -1.14369800 |
| O | 1.78093700  | 0.50913500  | -1.50400000 |
| O | -1.03689400 | -3.00033500 | -0.02673600 |
| O | -0.27174200 | 2.37710400  | -0.50341700 |
| O | -2.22965400 | 1.69710300  | 0.48560800  |
| C | -1.61975900 | 2.78333200  | -0.22706400 |
| H | -1.61275000 | 3.66903100  | 0.39595400  |
| H | -2.14443500 | 2.92926800  | -1.17251200 |
| H | 2.44074000  | 0.93510200  | -0.71289200 |
| H | 0.92084000  | -3.05123700 | -0.96274000 |
| H | -1.88880800 | -3.16369800 | 0.39393900  |
| O | 2.97619200  | 1.19329300  | 0.42132300  |
| O | 2.06539000  | 0.65840800  | 1.26401900  |
| C | 2.51098300  | -0.63524300 | 1.69306400  |
| H | 1.70301800  | -1.04109800 | 2.29712600  |
| H | 2.70383900  | -1.25975100 | 0.82186300  |
| H | 3.41697000  | -0.51715000 | 2.28572000  |
| O | -2.90785200 | -1.21213300 | 0.84920300  |
| H | -3.51211400 | -0.49888400 | 1.08656500  |

**dS-49S2- OOH**

|     |             |             |             |
|-----|-------------|-------------|-------------|
| 0 2 |             |             |             |
| C   | -1.06105400 | 0.04509600  | -0.66883900 |
| C   | -0.21347200 | -1.08831700 | -0.62097800 |
| C   | 1.08391800  | -0.85350300 | -0.25248100 |
| C   | 1.56889000  | 0.41574400  | 0.04369200  |
| C   | 0.77196000  | 1.54342300  | -0.00687400 |
| C   | -0.55505300 | 1.32359800  | -0.36321900 |
| O   | -1.37180900 | 2.40257800  | -0.40724100 |
| H   | -2.23289800 | 2.11436800  | -0.74254600 |
| O   | -2.33759900 | -0.03567200 | -1.04081100 |
| H   | -2.89680000 | -0.49394300 | -0.26872600 |
| O   | 2.89403400  | 0.33663100  | 0.32317100  |
| O   | 2.11386400  | -1.76025000 | -0.18133800 |
| C   | 3.13689300  | -1.06361400 | 0.53513900  |
| H   | 3.04519400  | -1.27738600 | 1.60106000  |
| H   | 4.10747400  | -1.32616000 | 0.13256100  |
| O   | -3.30640800 | -0.80440500 | 1.01677900  |
| O   | -2.12125100 | -0.79629400 | 1.65635500  |
| O   | 1.25641300  | 2.77675200  | 0.27767800  |
| H   | 0.55823300  | 3.42462900  | 0.12453300  |
| O   | -0.72633300 | -2.29722200 | -0.92678900 |
| H   | -0.07105300 | -2.98311800 | -0.75574000 |
| H   | -2.10993200 | 0.03011400  | 2.16778700  |

**OOH**

|     |             |             |             |
|-----|-------------|-------------|-------------|
| 0 2 |             |             |             |
| O   | 0.05493600  | 0.70787500  | 0.00000000  |
| O   | 0.05493600  | -0.59823100 | 0.00000000  |
| H   | -0.87897900 | -0.87715400 | 0.00000000  |
| 0 1 |             |             |             |
| O   | 0.70217600  | 0.11367200  | -0.05920600 |
| O   | -0.70217000 | -0.11366600 | -0.05921600 |
| H   | -1.02289000 | 0.62422800  | 0.47370000  |
| H   | 1.02283900  | -0.62427100 | 0.47367700  |

**dS-49S2- OOCH<sub>3</sub>**

|     |             |             |             |
|-----|-------------|-------------|-------------|
| 0 2 |             |             |             |
| C   | -0.82424600 | -0.13126100 | -0.93448300 |
| C   | 0.08636600  | -1.19456200 | -0.70899000 |
| C   | 1.31347800  | -0.84160600 | -0.21760100 |
| C   | 1.67912200  | 0.47751700  | 0.03324000  |
| C   | 0.82570200  | 1.54054200  | -0.19629800 |
| C   | -0.43211200 | 1.20136900  | -0.68251500 |
| O   | -1.31086900 | 2.20719800  | -0.90165700 |
| H   | -2.10045200 | 1.82504600  | -1.31268200 |
| O   | -2.04315900 | -0.32907900 | -1.41657100 |
| H   | -2.64626700 | -0.78672900 | -0.63167700 |
| O   | 2.96369500  | 0.51301500  | 0.46584500  |
| O   | 2.38539200  | -1.66305300 | 0.03504800  |
| C   | 3.26837500  | -0.84868900 | 0.81040900  |
| H   | 3.06139500  | -0.99722300 | 1.87116400  |
| H   | 4.29571300  | -1.06656700 | 0.54450500  |
| O   | -3.11814900 | -1.06993000 | 0.57461200  |
| O   | -2.05043300 | -0.74980000 | 1.32964500  |
| C   | -2.28575300 | 0.48992400  | 2.01025500  |
| H   | -1.35245900 | 0.73425500  | 2.51159700  |
| H   | -2.55626100 | 1.25907900  | 1.28848900  |
| H   | -3.08790800 | 0.34932000  | 2.73308600  |
| O   | 1.19974600  | 2.82112600  | 0.04433000  |
| H   | 0.48896300  | 3.40933600  | -0.23649600 |
| O   | -0.30884000 | -2.45556000 | -0.97570300 |
| H   | 0.37261600  | -3.07725800 | -0.69647300 |

**OOCH<sub>3</sub>**

|     |             |             |             |
|-----|-------------|-------------|-------------|
| 0 2 |             |             |             |
| O   | 1.17464000  | -0.27664100 | 0.00000400  |
| O   | 0.16488700  | 0.53524500  | -0.00000300 |
| C   | -1.09339900 | -0.17923800 | -0.00000400 |
| H   | -1.86365700 | 0.58642800  | -0.00077000 |
| H   | -1.14574800 | -0.79052100 | -0.89735600 |
| H   | -1.14641200 | -0.78931300 | 0.89813900  |
| 0 1 |             |             |             |
| O   | 1.15454900  | -0.26336900 | 0.10618800  |
| H   | 1.56109200  | -0.15766900 | -0.76328700 |
| O   | 0.02903200  | 0.60326000  | 0.01284000  |
| C   | -1.12569900 | -0.22369800 | -0.01862400 |
| H   | -1.96571900 | 0.46912600  | -0.03929000 |
| H   | -1.13314100 | -0.84579300 | -0.91493300 |
| H   | -1.17668200 | -0.84260400 | 0.87702900  |

**SET- Water**  
**Anions-Reagent/Product**

**dS-9A**

| -1 | 1           |             |             | 0 | 2           |             |             |  |
|----|-------------|-------------|-------------|---|-------------|-------------|-------------|--|
| C  | -1.42502200 | -1.00568100 | -0.00147000 | C | -1.44796500 | -1.02535200 | -0.00435000 |  |
| C  | -0.22360200 | -1.71391300 | -0.03483600 | C | -0.26141500 | -1.72265900 | -0.03765700 |  |
| C  | 0.91332400  | -0.93451700 | -0.04738400 | C | 0.87874000  | -0.93020000 | -0.04688200 |  |
| C  | 0.86176600  | 0.44312400  | -0.02914400 | C | 0.86987900  | 0.46448200  | -0.02845900 |  |
| C  | -0.32279500 | 1.15314800  | -0.00500500 | C | -0.28235000 | 1.19775600  | -0.00325700 |  |
| C  | -1.52421100 | 0.39947600  | 0.01788000  | C | -1.51636000 | 0.42965100  | 0.01881900  |  |
| H  | -0.20053800 | -2.79384900 | -0.05299800 | H | -0.22176600 | -2.80091200 | -0.04628200 |  |
| O  | -2.71428600 | 0.97289300  | 0.05386900  | O | -2.64125800 | 0.99167700  | 0.04876600  |  |
| O  | -2.62850000 | -1.69275700 | 0.02667800  | O | -2.62809900 | -1.67077800 | 0.02004800  |  |
| H  | -3.29802900 | -0.98767500 | 0.04957300  | H | -3.32840200 | -0.99701700 | 0.04774800  |  |
| O  | 2.15740600  | 0.95733200  | -0.12485500 | O | 2.17135800  | 0.92864300  | -0.12060600 |  |
| O  | 2.24906600  | -1.33082500 | -0.15843500 | O | 2.15979900  | -1.36352600 | -0.10476600 |  |
| C  | 2.96793000  | -0.16275000 | 0.24420600  | C | 2.97168800  | -0.20842700 | 0.19818100  |  |
| H  | 3.08327300  | -0.17296400 | 1.32972700  | H | 3.19049100  | -0.21797000 | 1.26446800  |  |
| H  | 3.91309300  | -0.11672600 | -0.28201400 | H | 3.85788200  | -0.22228200 | -0.42263200 |  |
| N  | -0.37601700 | 2.54919100  | 0.05715400  | N | -0.35386200 | 2.55498500  | 0.03961400  |  |
| H  | 0.40091200  | 3.00258300  | -0.40189800 | H | 0.45861600  | 3.07615500  | -0.24963300 |  |
| H  | -1.26042300 | 2.89782400  | -0.28600700 | H | -1.24747900 | 2.95750000  | -0.19686900 |  |

**dS-46A**

| -1 | 1           |             |             | 0 | 2           |             |             |  |
|----|-------------|-------------|-------------|---|-------------|-------------|-------------|--|
| C  | 0.26624000  | -1.43404900 | -0.02437800 | C | 0.19685300  | -1.48217400 | -0.00972200 |  |
| C  | 1.48267400  | -0.71472800 | 0.00643600  | C | 1.45918100  | -0.76912600 | 0.01311800  |  |
| C  | 1.42115900  | 0.68863800  | 0.01691500  | C | 1.45685600  | 0.67627900  | 0.01215500  |  |
| C  | 0.23179900  | 1.42452800  | -0.00861700 | C | 0.30198200  | 1.43077200  | -0.01538400 |  |
| C  | -0.91947200 | 0.66208300  | -0.02734900 | C | -0.87191600 | 0.67562100  | -0.02122800 |  |
| C  | -0.90681200 | -0.72087200 | -0.03951300 | C | -0.92694800 | -0.72985800 | -0.02813200 |  |
| O  | 2.63915400  | -1.34617500 | 0.03667500  | O | 2.54534000  | -1.40155800 | 0.03103800  |  |
| O  | 0.30749100  | -2.81369900 | -0.03810200 | O | 0.20183000  | -2.83454100 | -0.03085800 |  |
| O  | 2.62540300  | 1.37655100  | 0.06147700  | O | 2.65571200  | 1.30417100  | 0.04052200  |  |
| O  | -2.21529600 | -1.18660600 | -0.14094800 | O | -2.24140400 | -1.11933600 | -0.11467900 |  |
| O  | -2.24275000 | 1.10329400  | -0.14072400 | O | -2.12121400 | 1.17346800  | -0.06524400 |  |
| C  | -2.99136000 | -0.04728400 | 0.25245500  | C | -3.00486900 | 0.05457200  | 0.17066100  |  |
| H  | -3.94121400 | -0.06024500 | -0.26668400 | H | -3.84557300 | 0.11935000  | -0.50761500 |  |
| H  | -3.09553900 | -0.05187700 | 1.33886700  | H | -3.29094900 | 0.06281200  | 1.21963000  |  |
| H  | 1.25195200  | -3.03422300 | -0.01509600 | H | 1.12774600  | -3.12236800 | -0.01246700 |  |
| H  | 3.30446100  | 0.68329800  | 0.06542500  | H | 3.34724800  | 0.62329900  | 0.04917600  |  |
| N  | 0.22840500  | 2.82760900  | 0.04809000  | N | 0.29410900  | 2.81881900  | 0.04588800  |  |
| H  | 1.06031300  | 3.22614600  | -0.36399700 | H | 1.14064200  | 3.23645700  | -0.31374900 |  |
| H  | -0.59618800 | 3.22683200  | -0.37787000 | H | -0.52681800 | 3.23457500  | -0.37122200 |  |

**dS-48A**

-1 1

|   |             |             |             |
|---|-------------|-------------|-------------|
| C | -1.41852400 | -0.69338300 | 0.01509300  |
| C | -0.24774700 | -1.49791000 | -0.01890100 |
| C | 0.92019400  | -0.74364100 | -0.03608500 |
| C | 0.93016300  | 0.64082800  | -0.04388000 |
| C | -0.21802000 | 1.39330000  | -0.01580300 |
| C | -1.43681500 | 0.69439100  | 0.01456600  |
| O | -2.62581000 | -1.37348200 | 0.05329700  |
| H | -2.36953100 | -2.31048100 | 0.02059400  |
| O | 2.24317000  | 1.09153200  | -0.14487100 |
| O | 2.24115200  | -1.19697000 | -0.14845900 |
| C | 3.00339500  | -0.06059000 | 0.24948600  |
| H | 3.10416100  | -0.05654700 | 1.33636500  |
| H | 3.95531700  | -0.05694000 | -0.26609900 |
| O | -0.34805500 | -2.80656000 | -0.03658800 |
| O | -0.25400300 | 2.77776900  | -0.02209400 |
| N | -2.64952000 | 1.39925400  | 0.12423200  |
| H | -2.60749500 | 2.30468400  | -0.32146300 |
| H | -3.42940400 | 0.86794200  | -0.23540100 |
| H | 0.64607800  | 3.12029200  | -0.00075400 |

0 2

|   |             |             |             |
|---|-------------|-------------|-------------|
| C | -1.45758100 | -0.70573000 | 0.01272100  |
| C | -0.24785100 | -1.49763900 | -0.02124500 |
| C | 0.95565900  | -0.72161700 | -0.03221900 |
| C | 0.95228200  | 0.64054700  | -0.03130100 |
| C | -0.22728500 | 1.37360500  | -0.00964100 |
| C | -1.47048800 | 0.66520000  | 0.01536400  |
| O | -2.64599600 | -1.37583200 | 0.04565400  |
| H | -2.44595800 | -2.32371000 | 0.01855800  |
| O | 2.24586100  | 1.11226200  | -0.13312400 |
| O | 2.23275600  | -1.18678200 | -0.11041200 |
| C | 3.03897300  | -0.03336800 | 0.21239200  |
| H | 3.22245600  | -0.03272200 | 1.28571600  |
| H | 3.94183500  | -0.04581200 | -0.38299600 |
| O | -0.28870900 | -2.75069300 | -0.04086400 |
| O | -0.28933800 | 2.70873600  | -0.02108400 |
| N | -2.64911800 | 1.38778800  | 0.11357000  |
| H | -2.60112200 | 2.31443000  | -0.28382200 |
| H | -3.46366800 | 0.87864700  | -0.19630400 |
| H | 0.59143200  | 3.10713100  | -0.03392900 |

**dS-49A**

-1 1

|   |             |             |             |
|---|-------------|-------------|-------------|
| C | 0.26054800  | -1.40971400 | -0.01713600 |
| C | 1.43818900  | -0.66225100 | 0.00537700  |
| C | 1.46514100  | 0.74260200  | 0.00557300  |
| C | 0.22850100  | 1.42744500  | -0.02127400 |
| C | -0.92837600 | 0.68802500  | -0.03838500 |
| C | -0.91751900 | -0.69606500 | -0.03502100 |
| O | 2.64618200  | -1.33594600 | 0.04650000  |
| H | 3.32294100  | -0.64079300 | 0.06956800  |
| O | 0.25535500  | -2.78638500 | -0.02840400 |
| H | 1.16700200  | -3.10052300 | 0.00055500  |
| O | 2.60314100  | 1.40053000  | 0.04202100  |
| O | 0.23197600  | 2.80528800  | -0.02630700 |
| O | -2.22676400 | -1.16336700 | -0.14893600 |
| O | -2.24494900 | 1.12769400  | -0.13591600 |
| C | -3.00022200 | -0.02829500 | 0.24803600  |
| H | -3.94715400 | -0.03243700 | -0.27617600 |
| H | -3.10938600 | -0.03294900 | 1.33371500  |
| H | 1.16950600  | 3.05371300  | -0.00235500 |

0 2

|   |             |             |             |
|---|-------------|-------------|-------------|
| C | 0.32371600  | -1.41873800 | -0.01717400 |
| C | 1.47123700  | -0.65669600 | 0.00438300  |
| C | 1.44288900  | 0.79315100  | 0.01255100  |
| C | 0.16577800  | 1.47441400  | -0.00661000 |
| C | -0.94324600 | 0.69942600  | -0.02590300 |
| C | -0.86972200 | -0.70695700 | -0.02683400 |
| O | 2.67086200  | -1.26689900 | 0.02534000  |
| H | 3.35859400  | -0.58133600 | 0.04329200  |
| O | 0.30234600  | -2.78065800 | -0.02374700 |
| H | 1.20678800  | -3.11832400 | -0.01007100 |
| O | 2.51796600  | 1.43964400  | 0.03363000  |
| O | 0.13438300  | 2.82589900  | -0.01834700 |
| O | -2.10701400 | -1.22406900 | -0.07349800 |
| O | -2.26175400 | 1.06805000  | -0.10801900 |
| C | -3.01061900 | -0.11918900 | 0.16065900  |
| H | -3.84186500 | -0.19227500 | -0.52829600 |
| H | -3.30822900 | -0.13950700 | 1.20599300  |
| H | 1.05019200  | 3.14324800  | -0.00022900 |

*Neutral-Reagent/Product*

**dS-9N**

| 0 1 |             |             |             | 1 2 |             |             |             |
|-----|-------------|-------------|-------------|-----|-------------|-------------|-------------|
| C   | -1.40933800 | -1.00255700 | -0.00102500 | C   | -1.39028300 | -1.03748500 | -0.00165100 |
| C   | -0.20278600 | -1.70789300 | -0.03571500 | C   | -0.19444800 | -1.74520700 | -0.00424800 |
| C   | 0.93284800  | -0.93069800 | -0.05064600 | C   | 0.92562600  | -0.95442600 | -0.00209600 |
| C   | 0.89590600  | 0.44740000  | -0.03312800 | C   | 0.88007600  | 0.46731300  | 0.00652400  |
| C   | -0.28555300 | 1.16287300  | -0.00799400 | C   | -0.29315200 | 1.19355200  | 0.00397700  |
| C   | -1.45405100 | 0.38620100  | 0.01597600  | C   | -1.44278100 | 0.40307000  | 0.00536300  |
| H   | -0.18236600 | -2.78815100 | -0.05118000 | H   | -0.16654800 | -2.82391500 | -0.01062400 |
| O   | -2.65377100 | 1.06479300  | 0.05736400  | O   | -2.61899500 | 1.02813500  | 0.00826500  |
| H   | -3.37538400 | 0.42407400  | 0.04587900  | H   | -3.35330400 | 0.39528600  | -0.00131400 |
| O   | -2.63384700 | -1.63092200 | 0.02861800  | O   | -2.58960100 | -1.60542000 | -0.00482300 |
| H   | -2.51552000 | -2.58633600 | -0.00753700 | H   | -2.53575100 | -2.57180400 | -0.01050100 |
| O   | 2.18690700  | 0.95277200  | -0.12453000 | O   | 2.12218100  | 0.95511000  | 0.01150400  |
| O   | 2.25483000  | -1.33834300 | -0.14244300 | O   | 2.19940500  | -1.33879900 | -0.00437800 |
| C   | 2.99735400  | -0.17132100 | 0.23577300  | C   | 3.02512800  | -0.16239200 | -0.00304900 |
| H   | 3.13740300  | -0.17699300 | 1.31725100  | H   | 3.62365200  | -0.14888700 | 0.90061500  |
| H   | 3.92858800  | -0.13935000 | -0.31478200 | H   | 3.60872400  | -0.13664900 | -0.91635900 |
| N   | -0.33697800 | 2.54772800  | 0.05149800  | N   | -0.34528800 | 2.56954300  | 0.07158900  |
| H   | 0.47983100  | 3.00300100  | -0.32852000 | H   | 0.47662600  | 3.03192200  | -0.29002600 |
| H   | -1.19294100 | 2.93923200  | -0.31311900 | H   | -1.20130000 | 2.96848200  | -0.28638600 |

**dS-46N**

| 0 1 |             |             |             | 1 2 |             |             |             |
|-----|-------------|-------------|-------------|-----|-------------|-------------|-------------|
| C   | 0.24460600  | -1.42482400 | -0.02323000 | C   | 0.23675900  | -1.41384900 | 0.01488800  |
| C   | 1.42843700  | -0.68057000 | 0.00878800  | C   | 1.45764900  | -0.68070200 | -0.01163500 |
| C   | 1.41507400  | 0.70775100  | 0.01555600  | C   | 1.46168500  | 0.68790500  | -0.00741800 |
| C   | 0.21984300  | 1.44260800  | -0.01200000 | C   | 0.23659300  | 1.43255300  | 0.01733300  |
| C   | -0.92797400 | 0.67973400  | -0.03317700 | C   | -0.95585100 | 0.67274700  | 0.03584700  |
| C   | -0.92406500 | -0.70158100 | -0.04357500 | C   | -0.95214400 | -0.68645200 | 0.03207300  |
| O   | 2.65761100  | -1.29616800 | 0.04747900  | O   | 2.65330900  | -1.32155800 | -0.04355600 |
| O   | 0.34797100  | -2.79278300 | -0.03962900 | O   | 0.33129500  | -2.73600200 | 0.02558400  |
| O   | 2.59005000  | 1.42370200  | 0.05604500  | O   | 2.59617700  | 1.42182200  | -0.03096700 |
| O   | -2.22494000 | -1.16600400 | -0.14046900 | O   | -2.23664700 | -1.15777400 | 0.12211200  |
| O   | -2.24054600 | 1.12613500  | -0.12544800 | O   | -2.22586800 | 1.14348600  | 0.10938700  |
| C   | -3.00620700 | -0.02515000 | 0.24616000  | C   | -3.03955300 | -0.01062600 | -0.20803300 |
| H   | -3.94311000 | -0.02947500 | -0.29514300 | H   | -3.23741900 | -0.00726100 | -1.27781500 |
| H   | -3.13238400 | -0.03494700 | 1.32902100  | H   | -3.93068100 | -0.00058400 | 0.40411300  |
| H   | -0.52794000 | -3.19509800 | -0.01850300 | H   | -0.53508600 | -3.16854000 | 0.03244800  |
| H   | 2.54031100  | -2.25320400 | 0.00435400  | H   | 2.52906400  | -2.27976900 | -0.02052900 |
| H   | 3.33546100  | 0.81109600  | 0.03059500  | H   | 3.37078800  | 0.84278800  | -0.04720400 |
| N   | 0.22010600  | 2.83764100  | 0.04668100  | N   | 0.24208200  | 2.75322100  | 0.02318200  |
| H   | 1.05541400  | 3.24454900  | -0.34957400 | H   | 1.11745200  | 3.25929800  | 0.01108800  |
| H   | -0.60795100 | 3.24672800  | -0.36246600 | H   | -0.62564500 | 3.27225900  | 0.03681500  |

**dS-48N**

0 1

|   |             |             |             |
|---|-------------|-------------|-------------|
| C | 1.41854200  | 0.69772300  | 0.01173600  |
| C | 0.22127700  | 1.42094200  | -0.01938900 |
| C | -0.94077600 | 0.68806800  | -0.04057300 |
| C | -0.92434900 | -0.69386800 | -0.04016700 |
| C | 0.24508600  | -1.41435300 | -0.01451900 |
| C | 1.45033100  | -0.69482200 | 0.01241700  |
| O | 2.62859700  | 1.35463800  | 0.05590200  |
| H | 2.47527300  | 2.30627200  | 0.01097900  |
| O | -2.22498400 | -1.16305700 | -0.13785400 |
| O | -2.25127400 | 1.12988500  | -0.14156400 |
| C | -3.01083600 | -0.02456200 | 0.24225700  |
| H | -3.13317700 | -0.02472400 | 1.32549800  |
| H | -3.94883200 | -0.03644100 | -0.29677900 |
| O | 0.30677300  | 2.78938300  | -0.03288200 |
| H | -0.57339500 | 3.18235000  | -0.01848800 |
| O | 0.31858700  | -2.78540300 | -0.01876600 |
| N | 2.66861900  | -1.37374500 | 0.11960300  |
| H | 2.64350600  | -2.29080000 | -0.30226100 |
| H | 3.44659700  | -0.83445300 | -0.23147300 |
| H | -0.56753800 | -3.16434600 | -0.03396000 |

1 2

|   |             |             |             |
|---|-------------|-------------|-------------|
| C | 1.43087000  | 0.71362200  | 0.00496400  |
| C | 0.25710000  | 1.44111200  | -0.00721300 |
| C | -0.91439000 | 0.69744600  | -0.01510200 |
| C | -0.93463900 | -0.71383300 | -0.00997300 |
| C | 0.19951100  | -1.45286400 | -0.00004300 |
| C | 1.42801400  | -0.72079300 | 0.00851300  |
| O | 2.64016900  | 1.29375000  | 0.01615200  |
| H | 2.55646700  | 2.25796000  | 0.00113400  |
| O | -2.22617000 | -1.13585800 | -0.07192100 |
| O | -2.16266700 | 1.16469900  | -0.05755100 |
| C | -3.04351600 | 0.02699500  | 0.10329700  |
| H | -3.44229900 | 0.04696600  | 1.11298000  |
| H | -3.80271900 | 0.05794800  | -0.66794900 |
| O | 0.34031700  | 2.79579400  | -0.01296700 |
| H | -0.53377500 | 3.20416400  | 0.00605600  |
| O | 0.30050700  | -2.80154300 | -0.01054200 |
| N | 2.58080300  | -1.36989800 | 0.01575100  |
| H | 2.59658600  | -2.37992500 | 0.01451700  |
| H | 3.45551900  | -0.86431000 | 0.01530400  |
| H | -0.57034000 | -3.21835600 | -0.00430900 |

**dS-49N**

0 1

|   |             |             |             |
|---|-------------|-------------|-------------|
| C | 0.24593000  | -1.42861300 | -0.01964300 |
| C | 1.43044000  | -0.68344400 | 0.00638400  |
| C | 1.41265200  | 0.70444700  | 0.00665800  |
| C | 0.20934500  | 1.41736900  | -0.02053500 |
| C | -0.94481300 | 0.67059900  | -0.04295100 |
| C | -0.92705900 | -0.71212900 | -0.04105000 |
| O | 2.60760900  | -1.38838000 | 0.03967900  |
| H | 3.35098000  | -0.77393000 | 0.08494700  |
| O | 0.24177100  | -2.79659500 | -0.02932000 |
| H | 1.15232700  | -3.11678500 | -0.00571800 |
| O | 2.62570800  | 1.34589600  | 0.04755000  |
| H | 2.48816100  | 2.30118400  | 0.02687400  |
| O | 0.28263500  | 2.78439600  | -0.03044800 |
| H | -0.60047500 | 3.17036900  | 0.00085400  |
| O | -2.22530300 | -1.18242300 | -0.13193700 |
| O | -2.25320200 | 1.11059100  | -0.13537500 |
| C | -3.01492200 | -0.04583200 | 0.24282600  |
| H | -3.94883500 | -0.05786100 | -0.30320500 |
| H | -3.14535400 | -0.04523900 | 1.32493100  |

1 2

|   |             |             |             |
|---|-------------|-------------|-------------|
| C | 0.25078500  | -1.46245400 | -0.00002400 |
| C | 1.42055500  | -0.71812600 | 0.00002000  |
| C | 1.39782600  | 0.72042800  | 0.00002300  |
| C | 0.20815000  | 1.45586600  | -0.00001900 |
| C | -0.93441100 | 0.70340500  | -0.00008400 |
| C | -0.91313100 | -0.72092000 | 0.00002000  |
| O | 2.57936000  | -1.37073200 | -0.00016500 |
| H | 3.33474400  | -0.76346700 | 0.00097200  |
| O | 0.20767300  | -2.81574000 | -0.00007700 |
| H | 1.10306900  | -3.17889800 | 0.00021500  |
| O | 2.58555500  | 1.30144900  | 0.00012100  |
| H | 2.50911100  | 2.26901700  | 0.00002000  |
| O | 0.30858600  | 2.80781900  | -0.00010800 |
| H | -0.56033900 | 3.22850500  | 0.00022300  |
| O | -2.15735800 | -1.17632700 | 0.00004500  |
| O | -2.20183700 | 1.12126600  | -0.00011000 |
| C | -3.04522700 | -0.04178000 | 0.00013200  |
| H | -3.63503100 | -0.05784500 | -0.90907100 |
| H | -3.63466000 | -0.05770700 | 0.90958100  |

**OOH**

|     |             |             |             |      |             |             |             |
|-----|-------------|-------------|-------------|------|-------------|-------------|-------------|
| 0 2 |             |             |             | -1 1 |             |             |             |
| O   | -2.32936300 | -0.31824800 | 0.52875200  | O    | -0.00271300 | -0.04663300 | -0.23994500 |
| O   | -1.66852400 | -0.30799700 | -0.59392300 | O    | 0.00991000  | 1.33740100  | 0.18267200  |
| H   | -0.79941800 | 0.20712800  | -0.40650400 | H    | -0.04070100 | 1.82128500  | -0.64798000 |
| O   | 0.42567300  | 1.01623100  | -0.05719700 | O    | -2.47334900 | -0.64501700 | 0.16973300  |
| H   | 1.24124900  | 0.47622500  | 0.00917100  | H    | -2.92852300 | -0.49611400 | -0.66247800 |
| H   | 0.32765800  | 1.46208200  | 0.79053200  | H    | -1.50411200 | -0.42385500 | -0.01103100 |
| O   | 2.67554700  | -0.54048300 | 0.00922600  | O    | 2.49874500  | -0.62346400 | -0.04612400 |
| H   | 3.44974400  | -0.11520000 | -0.37313300 | H    | 2.70092000  | -0.66521000 | 0.89149800  |
| H   | 2.95410500  | -0.82626400 | 0.88506500  | H    | 1.51167100  | -0.41439800 | -0.10070300 |

**OOCH<sub>3</sub>**

|     |             |             |             |      |             |             |             |
|-----|-------------|-------------|-------------|------|-------------|-------------|-------------|
| 0 2 |             |             |             | -1 1 |             |             |             |
| O   | -1.28864400 | 0.14821000  | 0.02595600  | O    | -0.05833400 | -0.61003600 | 0.11827500  |
| O   | -2.52254900 | 0.47009900  | -0.18531000 | O    | 0.00433100  | 0.69589300  | 0.72364300  |
| C   | -1.10053800 | -1.28630800 | 0.14080700  | H    | 1.50813500  | -0.86818800 | -0.03475000 |
| H   | -1.42400700 | -1.74428700 | -0.78930400 | O    | 2.50592700  | -0.97909600 | -0.09050700 |
| H   | -0.03613700 | -1.41893300 | 0.30514400  | H    | 2.80727900  | -0.23940700 | -0.62410200 |
| H   | -1.68343500 | -1.63529100 | 0.98812400  | O    | -2.61519600 | -0.72489700 | -0.27703100 |
| O   | 2.72463800  | -0.91578700 | -0.13541600 | H    | -3.01032900 | -0.76253000 | 0.59731200  |
| H   | 2.27763200  | -0.05873100 | -0.02920900 | H    | -1.62022700 | -0.71002900 | -0.11950900 |
| H   | 3.66276600  | -0.71533000 | -0.08104300 | C    | 0.16616000  | 1.64116900  | -0.31736300 |
| O   | 1.32338600  | 1.52199000  | 0.19114700  | H    | 1.08811000  | 1.44792400  | -0.87093000 |
| H   | 0.39009300  | 1.31006800  | 0.06821300  | H    | -0.68643800 | 1.61098700  | -0.99923400 |
| H   | 1.52167200  | 2.18426000  | -0.47778000 | H    | 0.22268400  | 2.61931500  | 0.16035500  |

**SET- Pentyl Ethanoate**  
**Neutral-Reagent/Product**

**dS-9N**

|     |             |             |             |     |             |             |             |
|-----|-------------|-------------|-------------|-----|-------------|-------------|-------------|
| 0 1 |             |             |             | 1 2 |             |             |             |
| C   | -1.40407800 | -1.00451200 | -0.00029200 | C   | 1.38372000  | -1.03941000 | 0.00291000  |
| C   | -0.19685900 | -1.70860300 | -0.03274900 | C   | 0.19562800  | -1.75055700 | 0.00307600  |
| C   | 0.93990200  | -0.93057900 | -0.04862900 | C   | -0.92677500 | -0.95346900 | 0.00217600  |
| C   | 0.89905100  | 0.44884600  | -0.03080800 | C   | -0.88178200 | 0.46840800  | 0.00040100  |
| C   | -0.28523700 | 1.16104500  | -0.00577700 | C   | 0.28940400  | 1.20002200  | 0.00293500  |
| C   | -1.45328400 | 0.38320100  | 0.01512700  | C   | 1.43825400  | 0.40077800  | -0.00478900 |
| H   | -0.16465100 | -2.78906400 | -0.04587500 | H   | 0.15495700  | -2.82956200 | 0.00640800  |
| O   | -2.64762800 | 1.04979900  | 0.05074900  | O   | 2.61346300  | 1.01499600  | -0.01527400 |
| H   | -3.35881500 | 0.39960400  | 0.04390500  | H   | 3.34371400  | 0.37802900  | -0.01251000 |
| O   | -2.63035200 | -1.61915300 | 0.03052500  | O   | 2.59394800  | -1.58952900 | 0.00893900  |
| H   | -2.52999400 | -2.57389200 | -0.02584000 | H   | 2.56426800  | -2.55691800 | 0.01063800  |
| O   | 2.17926900  | 0.95497900  | -0.12221000 | O   | -2.12314000 | 0.95307200  | 0.00047600  |
| O   | 2.25114200  | -1.33420100 | -0.13873500 | O   | -2.19291400 | -1.33921100 | 0.00256400  |
| C   | 2.99224500  | -0.16635900 | 0.22680500  | C   | -3.02307200 | -0.16373200 | -0.00741000 |
| H   | 3.15028900  | -0.17053500 | 1.30804600  | H   | -3.60812500 | -0.14939000 | -0.92146000 |
| H   | 3.92005000  | -0.13344700 | -0.33181700 | H   | -3.62764700 | -0.14766000 | 0.89358200  |
| N   | -0.34572800 | 2.54294600  | 0.04865400  | N   | 0.34813100  | 2.56453300  | -0.05666300 |
| H   | 0.45477500  | 3.02221800  | -0.33236500 | H   | -0.46876500 | 3.07512400  | 0.24058800  |
| H   | -1.22144100 | 2.93485800  | -0.26132700 | H   | 1.22155900  | 2.99178000  | 0.20995100  |



**dS-46N**

|     |             |             |             |     |             |             |             |
|-----|-------------|-------------|-------------|-----|-------------|-------------|-------------|
| 0 1 |             |             |             | 1 2 |             |             |             |
| C   | 0.23823100  | -1.42227800 | -0.02339400 | C   | -0.22305200 | -1.41172100 | -0.01293900 |
| C   | 1.42336400  | -0.68358100 | 0.00725100  | C   | -1.45006300 | -0.69270600 | 0.01167800  |
| C   | 1.41646400  | 0.70401600  | 0.01403600  | C   | -1.46551300 | 0.67557800  | 0.00406600  |
| C   | 0.22226400  | 1.44237300  | -0.01072600 | C   | -0.24641400 | 1.43297700  | -0.01532200 |
| C   | -0.93017100 | 0.68427000  | -0.03143600 | C   | 0.95486000  | 0.68242200  | -0.02656900 |
| C   | -0.92828300 | -0.69770200 | -0.04138000 | C   | 0.95869200  | -0.67886600 | -0.02667700 |
| O   | 2.64517900  | -1.29839300 | 0.04441900  | O   | -2.64013200 | -1.32768900 | 0.04760600  |
| O   | 0.34181900  | -2.78511000 | -0.03905500 | O   | -0.30714300 | -2.73553100 | -0.02573900 |
| O   | 2.58793600  | 1.40580800  | 0.05041600  | O   | -2.60111900 | 1.39266100  | 0.02255400  |
| O   | -2.21984500 | -1.16271400 | -0.13446400 | O   | 2.23406600  | -1.14543900 | -0.11794800 |
| O   | -2.23367400 | 1.12870200  | -0.12488200 | O   | 2.21235500  | 1.15707400  | -0.09233100 |
| C   | -3.00060300 | -0.01866000 | 0.23971100  | C   | 3.04550100  | 0.00358500  | 0.18731700  |
| H   | -3.93521700 | -0.02398700 | -0.30767700 | H   | 3.28724400  | 0.00352300  | 1.24880600  |
| H   | -3.14142800 | -0.02717700 | 1.32283100  | H   | 3.91387200  | 0.02214200  | -0.45888800 |
| H   | -0.53292500 | -3.18678700 | -0.02681800 | H   | 0.56175300  | -3.16311500 | -0.04080600 |
| H   | 2.52252000  | -2.25413800 | 0.02121200  | H   | -2.53165500 | -2.28700600 | 0.01509800  |
| H   | 3.32243100  | 0.78179400  | 0.05517200  | H   | -3.37162100 | 0.80828500  | 0.04440100  |
| N   | 0.23235900  | 2.83456800  | 0.04399700  | N   | -0.27276500 | 2.75342600  | -0.02258400 |
| H   | 1.09293100  | 3.24274700  | -0.28895600 | H   | -1.15645100 | 3.24622500  | -0.01338900 |
| H   | -0.57373400 | 3.26860100  | -0.37960100 | H   | 0.57792400  | 3.29974400  | -0.03960600 |

**dS-48N**

|     |             |             |             |     |             |             |             |
|-----|-------------|-------------|-------------|-----|-------------|-------------|-------------|
| 0 1 |             |             |             | 1 2 |             |             |             |
| C   | 1.42110700  | 0.69566500  | 0.01093200  | C   | -1.43062900 | -0.71083700 | 0.00241800  |
| C   | 0.22333500  | 1.41714900  | -0.01849700 | C   | -0.25650500 | -1.43832700 | -0.01385600 |
| C   | -0.94098000 | 0.68999800  | -0.03502200 | C   | 0.91484500  | -0.69900500 | -0.02263000 |
| C   | -0.92527400 | -0.69104100 | -0.03454900 | C   | 0.93788400  | 0.71221800  | -0.02053800 |
| C   | 0.24215100  | -1.41388100 | -0.01399300 | C   | -0.19511700 | 1.45304600  | -0.00529400 |
| C   | 1.45007900  | -0.69771200 | 0.01398800  | C   | -1.42747800 | 0.72450500  | 0.00755000  |
| O   | 2.62072100  | 1.35042900  | 0.05038800  | O   | -2.63131300 | -1.29375200 | 0.02078700  |
| H   | 2.45941600  | 2.29944600  | 0.00716800  | H   | -2.54528700 | -2.25827100 | 0.00763600  |
| O   | -2.21793000 | -1.15941800 | -0.13334100 | O   | 2.22373500  | 1.12993300  | -0.08276400 |
| O   | -2.24208900 | 1.13383300  | -0.13591600 | O   | 2.15794500  | -1.16898600 | -0.05759100 |
| C   | -3.00429100 | -0.02057300 | 0.23578600  | C   | 3.03791100  | -0.02999100 | 0.12411200  |
| H   | -3.14346700 | -0.02111100 | 1.31889000  | H   | 3.41045300  | -0.04609800 | 1.14535300  |
| H   | -3.93851300 | -0.03094600 | -0.31187800 | H   | 3.82137600  | -0.06684600 | -0.62333600 |
| O   | 0.31342700  | 2.78058600  | -0.03439900 | O   | -0.35217000 | -2.78558900 | -0.01170800 |
| H   | -0.56437700 | 3.17549800  | -0.03608400 | H   | 0.51298000  | -3.21260600 | -0.02852700 |
| O   | 0.30422900  | -2.77759900 | -0.02604900 | O   | -0.29208400 | 2.79522900  | -0.01053000 |
| N   | 2.66386900  | -1.37628800 | 0.12072000  | N   | -2.57887400 | 1.37467400  | 0.02366400  |
| H   | 2.64704800  | -2.30475800 | -0.27308800 | H   | -2.60086500 | 2.38524000  | 0.02529400  |
| H   | 3.45436900  | -0.84056700 | -0.20418200 | H   | -3.45752300 | 0.87538000  | 0.03022200  |
| H   | -0.58518700 | -3.14382000 | -0.06320200 | H   | 0.57661400  | 3.21613300  | -0.01842000 |

**dS-49N**

0 1

|   |             |             |             |
|---|-------------|-------------|-------------|
| C | 0.25646000  | -1.43040600 | -0.02156100 |
| C | 1.43062700  | -0.66759000 | 0.00425000  |
| C | 1.40331200  | 0.71790900  | 0.00382300  |
| C | 0.19304300  | 1.41495300  | -0.02281700 |
| C | -0.95201000 | 0.65667900  | -0.04212100 |
| C | -0.92723600 | -0.72817600 | -0.04191700 |
| O | 2.60680800  | -1.36094600 | 0.04411000  |
| H | 3.34346300  | -0.73998400 | 0.07943000  |
| O | 0.29383700  | -2.78610100 | -0.02890500 |
| H | 1.21712200  | -3.06429300 | -0.01229800 |
| O | 2.60564100  | 1.36412400  | 0.04810600  |
| H | 2.45960300  | 2.31698500  | 0.03254400  |
| O | 0.25237900  | 2.77828700  | -0.02868800 |
| H | -0.63437900 | 3.15363200  | -0.02692300 |
| O | -2.21498600 | -1.19777500 | -0.13136600 |
| O | -2.25223900 | 1.09334900  | -0.12803500 |
| C | -3.00833700 | -0.07004000 | 0.23922400  |
| H | -3.94173600 | -0.08352600 | -0.30984300 |
| H | -3.15075800 | -0.07029300 | 1.32202900  |

1 2

|   |             |             |             |
|---|-------------|-------------|-------------|
| C | 0.26317600  | -1.46272500 | 0.00235700  |
| C | 1.42302000  | -0.71048100 | -0.00381200 |
| C | 1.38807600  | 0.72189000  | 0.00288300  |
| C | 0.19270100  | 1.45558000  | -0.00136700 |
| C | -0.94442400 | 0.70212200  | -0.00304400 |
| C | -0.91340200 | -0.72402500 | 0.00239000  |
| O | 2.58329900  | -1.36230600 | -0.01392800 |
| H | 3.34270100  | -0.76138900 | -0.01088800 |
| O | 0.23292700  | -2.80196500 | 0.00426700  |
| H | 1.13057600  | -3.16003600 | 0.01298700  |
| O | 2.56758200  | 1.31369900  | 0.01175500  |
| H | 2.48513700  | 2.28190300  | 0.01071200  |
| O | 0.31191300  | 2.79910600  | -0.00036200 |
| H | -0.54317200 | 3.24739000  | -0.00914700 |
| O | -2.14668700 | -1.18457100 | 0.00524300  |
| O | -2.21256000 | 1.11178500  | -0.00740200 |
| C | -3.04716900 | -0.05757000 | 0.00018200  |
| H | -3.64064700 | -0.08640700 | -0.90767600 |
| H | -3.63824600 | -0.07620300 | 0.90990800  |

**OOH**

0 2

|   |             |             |            |
|---|-------------|-------------|------------|
| O | 0.05490400  | 0.70764200  | 0.00000000 |
| O | 0.05490400  | -0.59799200 | 0.00000000 |
| H | -0.87845700 | -0.87720500 | 0.00000000 |

-1 1

|   |             |             |            |
|---|-------------|-------------|------------|
| O | 0.05522000  | 0.79117900  | 0.00000000 |
| O | 0.05522000  | -0.68199800 | 0.00000000 |
| H | -0.88352700 | -0.87344800 | 0.00000000 |

**OOCH<sub>3</sub>**

0 2

|   |             |             |             |
|---|-------------|-------------|-------------|
| O | -0.16433400 | 0.53477700  | -0.00001100 |
| O | -1.17497900 | -0.27625300 | 0.00001500  |
| C | 1.09312700  | -0.17930100 | -0.00001500 |
| H | 1.14554900  | -0.79177200 | -0.89645700 |
| H | 1.86243800  | 0.58710100  | -0.00256100 |
| H | 1.14776200  | -0.78771800 | 0.89907800  |

-1 1

|   |             |             |             |
|---|-------------|-------------|-------------|
| O | 1.22686700  | -0.27766800 | -0.00000200 |
| O | 0.07085300  | 0.60163100  | 0.00006500  |
| C | -1.04900100 | -0.21564700 | -0.00001500 |
| H | -1.07351500 | -0.86255700 | -0.88817600 |
| H | -1.07575600 | -0.86090900 | 0.88943900  |
| H | -1.93848500 | 0.42564600  | -0.00167200 |

## References

1. Kuppermann, A.; Truhlar, D. G., Exact tunneling calculations. *Journal of the American Chemical Society* **1971**, *93* (8), 1840-1851.
2. Eyring, H., The Activated Complex in Chemical Reactions. *The Journal of Chemical Physics* **1935**, *3* (2), 107-115.
3. Evans, M. G.; Polanyi, M., Some applications of the transition state method to the calculation of reaction velocities, especially in solution. *Transactions of the Faraday Society* **1935**, *31* (0), 875-894.
4. Truhlar, D. G.; Garrett, B. C.; Klippenstein, S. J., Current Status of Transition-State Theory. *The Journal of Physical Chemistry* **1996**, *100* (31), 12771-12800.
5. Marcus, R. A., Electron transfer reactions in chemistry theory and experiment. *Journal of Electroanalytical Chemistry* **1997**, *438* (1), 251-259.
6. Von Smoluchowski, M., Mathematical theory of the kinetics of the coagulation of colloidal solutions. *Z. Phys. Chem* **1917**, *92*, 129-168.
7. Truhlar, D. G., Nearly encounter-controlled reactions: The equivalence of the steady-state and diffusional viewpoints. *Journal of Chemical Education* **1985**, *62* (2), 104.
8. Collins, F. C.; Kimball, G. E., Diffusion-controlled reaction rates. *Journal of Colloid Science* **1949**, *4* (4), 425-437.
9. a) G. G. Stokes, *Mathematical and Physical Papers*, Cambridge University Press, Cambridge, 1903. b) A. Einstein, Motion of suspended particles in stationary liquids required from the molecular kinetic theory of heat, 1905, vol. 17 c) Einstein, A., Über einen die Erzeugung und Verwandlung des Lichtes betreffenden heuristischen Gesichtspunkt. *Annalen der Physik* **1905**, *322* (6), 132-148.
